1 **Harnessing natural diversity to identify key amino acid residues in**  
2 **prolidase**

3 Hanna Marie Schilbert<sup>1,2\*</sup>, Vanessa Pellegrinelli<sup>1</sup>, Sergio Rodriguez-Cuenca<sup>1</sup>, Antonio  
4 Vidal-Puig<sup>1</sup>, Boas Pucker<sup>3, 4, 5\*</sup>

5 1 Metabolic Research Laboratories, Wellcome Trust MRC Institute of Metabolic  
6 Science, Addenbrooke's Hospital, University of Cambridge, Cambridge, UK.

7 2 Proteome and Metabolome Research, Center for Biotechnology (CeBiTec), Bielefeld  
8 University, Universitätsstraße 27, Bielefeld, Germany

9 3 Genetics and Genomics of Plants, Faculty of Biology, Bielefeld University, Germany

10 4 Centre for Biotechnology (CeBiTec), Bielefeld University, Germany

11 5 Evolution and Diversity, Department of Plant Sciences, University of Cambridge, UK

12

13 \* corresponding authors:

14 HS: [hschilbe@cebitec.uni-bielefeld.de](mailto:hschilbe@cebitec.uni-bielefeld.de)

15 BP: [bpucker@cebitec.uni-bielefeld.de](mailto:bpucker@cebitec.uni-bielefeld.de)

16

17

18

19 Key words: PEPD, Peptidase D, Xaa-Pro dipeptidase, cancer, natural variation, polymorphism, prolidase  
20 deficiency, conservation, phylogeny

21

22

23

24 Prolidase (PEPD) catalyses the cleavage of dipeptides with high affinity for proline at the C-terminal  
25 end. This function is required in almost all living organisms. In order to detect strongly conserved  
26 residues in PEPD, we analysed PEPD orthologous sequences identified in data sets of animals, plants,  
27 fungi, archaea, and bacteria. Due to conservation over very long evolutionary time, conserved residues  
28 are likely to be of functional relevance. Single amino acid mutations in *PEPD* cause a disorder called  
29 prolidase deficiency and are associated with various cancer types. We provide new insights into 15  
30 additional residues with putative roles in prolidase deficiency and cancer. Moreover, our results  
31 confirm previous reports identifying five residues involved in the binding of metal cofactors as highly  
32 conserved and enable the classification of several non-synonymous single nucleotide polymorphisms  
33 as likely pathogenic and seven as putative polymorphisms. Moreover, more than 50 novel conserved  
34 residues across species were identified. Conservation degree per residue across the animal kingdom  
35 were mapped to the human PEPD 3D structure revealing the strongest conservation close to the active  
36 site accompanied with a higher functional implication and pathogenic potential, validating the  
37 importance of a characteristic active site fold for prolidase identity.

38

39

40

41

42

43

44

45

46

47

48

49

50

51

## 52 Introduction

53 Human peptidase D (PEPD) or prolidase (EC 3.4.13.9) is a multifunctional manganese-requiring  
54 homodimeric iminodipeptidase. Its enzymatic activity was reported in 1937 for the first time with the  
55 observation of Glycyl-Proline dipeptides degradation <sup>1</sup>. PEPD belongs to the metalloproteinase M24  
56 family. Its major function is the hydrolysis of peptide bonds of imidodipeptides with a C-terminal  
57 proline or hydroxyproline, thus liberating proline and hydroxyproline, respectively <sup>2</sup>.

58 The biological significance of *PEPD* is indicated by the presence in the genomes of most animal species  
59 and its expression in several tissues <sup>3-7</sup>. Moreover, *PEPD* has been identified in fungi <sup>8,9</sup>, plants <sup>10</sup>,  
60 archaea <sup>11</sup>, and even bacteria <sup>12-15</sup>. Especially the presence of PEPD in several mycoplasma species  
61 stresses its essential role in their metabolism and maintaining cellular functions, as these intracellular  
62 parasites display an otherwise extremely reduced gene set <sup>16</sup>.

63

## 64 Physiological role of PEPD

65 PEPD is the only known metalloenzyme in eukaryotes catalysing the hydrolysis of X-P <sup>17</sup>. Therefore,  
66 deleterious mutations in *PEPD* in human lead to a rare autosomal disease called prolidase deficiency  
67 (PD), which is characterized by skin ulcerations due to defective wound healing, immunodeficiency,  
68 mental retardation, splenomegaly, recurrent respiratory infections and imidodipeptiduria <sup>18-20</sup>. To  
69 date, 29 different pathogenic variants have been reported and associated with PD, resulting in a partial  
70 or complete enzyme inactivation <sup>21</sup>. In addition to this autosomal disease, perturbations in PEPD  
71 expression, (serum) activity or serum levels have been associated with several (patho)physiological  
72 processes, including remodelling of the extracellular matrix, inflammation, carcinogenesis,  
73 angiogenesis, cell migration, and cell differentiation <sup>22-27</sup>. Moreover, alterations of PEPD serum activity  
74 are associated with a spectrum of mental diseases, like post-traumatic stress disorder <sup>28</sup> and  
75 depression <sup>29</sup>. Altered PEPD activity and serum level have also been frequently described in different  
76 cancer types suggesting an involvement of PEPD in cancer <sup>2,23,24,48</sup>.

77 In bacteria and archaea, PEPD is assumed to be involved in the degradation of intracellular proteins  
78 and proline recycling <sup>30</sup>. In animals, PEPD is involved in the degradation proline-rich dietary proteins  
79 and seems to play an important role in proline recycling <sup>2</sup>. Since collagen (a major components of  
80 extracellular matrix) consists of 25% proline and hydroxyproline, PEPD activity is thought to be the rate  
81 limiting factor in collagen turnover <sup>2,31</sup>. Interestingly, there is a growing body of evidence showing that  
82 PEPD may also have additional pleiotropic effects, independent from its enzymatic activity. Thus, PEPD

83 has been reported to influence the p53 pathway by direct protein-protein interaction <sup>32</sup> and acts as  
84 ligand for EGFR and ErbB2 when released by injured cells <sup>33,34</sup>.

85

### 86 **Characterization of the enzymatic and structural properties of PEPD**

87 The crystal structure of PEPD has been extensively investigated in several species, including bacteria  
88 <sup>16,35</sup>, archaea <sup>36</sup>, and eukaryotes <sup>17</sup>. PEPD belongs together with methionine aminopeptidase (MetAP;  
89 EC 3.4.11.18) and aminopeptidase P (APP; EC 3.4.11.9) to the “pita-bread” family, which is able to  
90 hydrolyse amido-, imido-, and amidino-containing bonds <sup>37,38</sup>. Characteristic for this family is the highly  
91 conserved characteristic pita-bread fold in the catalytic C-terminal domain including the metal centre  
92 and a well-defined substrate binding pocket <sup>37,39</sup>. The catalytic C-terminal domain comprises five highly  
93 conserved residues for the binding of the metal cofactors: D276, D287, H370, E412, and E452 (positions  
94 refer to human sequence) <sup>17</sup>.

95 The preferred substrate, optimal pH and temperature, and required metal ions (e.g. Mn<sup>2+</sup>, Zn<sup>2+</sup> or Co<sup>2+</sup>)  
96 are species-dependent <sup>2</sup>. Although PEPD appears to be a (homo)dimer in most species including  
97 humans, it can be also active as a monomer or even as a tetramer in certain species <sup>2</sup>. The homodimeric  
98 human PEPD preferably hydrolyses G-P, is adapted to a pH value of 7.8 with a temperature optimum  
99 of 50°C, and shows long-term activity at 37°C <sup>17,40</sup>. *In vitro* studies based on recombinant PEPD  
100 produced in CHO cell lines and *E. coli* as well as endogenous PEPD of human fibroblasts, revealed G-P  
101 as preferred substrate followed by a lower substrate specificity for A-P, M-P, F-P, V-P, and L-P  
102 dipeptides <sup>40</sup>. Moreover, in human PEPD the substrate specificity for dipeptides is determined through  
103 the presence of specific residues, like R398 and T241, which prevent the binding of longer substrates  
104 <sup>17</sup>.

105

### 106 **Regulation of PEPD**

107 PEPD is a phosphotyrosine and phosphothreonine/serine enzyme <sup>41,42</sup>. Phosphorylation results in an  
108 increase of PEPD activity and is mediated by the MAPK pathway and NO/cGMP signalling for tyrosine  
109 and threonine/serine residues, respectively <sup>41,42</sup>. Phosphorylation mediated up-regulation of PEPD  
110 activity was reported without an increased gene expression, indicating the importance of  
111 post-translational modification in its regulation <sup>41,42</sup>. *In silico* analysis of human PEPD indicated  
112 post-translational modifications like glycosylations. N-glycosylation was predicted for N13 and N172,  
113 while O-glycosylation was thought to effect T458 <sup>22</sup>.

114 We anticipate the detailed profiling of conserved residues in PEPD during evolution may help to  
115 identify and understand essential components for mentioned PEPD functions and structure. This  
116 increased knowledge could help explain the role of PEPD in diseases, especially prolidase deficiency.  
117 Taxon-specific conservation of residues provides additional insights e.g. into post-translational  
118 modification in eukaryotes. This study identified orthologous sequences of PEPD in peptide sequence  
119 sets of several hundred organisms including bacteria, archaea, animal, fungi, and plant species to  
120 investigate the conservation of residues in PEPD across the tree of life. We further identified highly  
121 conserved residues, which are likely to play key functional roles.

122

## 123 **Results and Discussion**

### 124 **Sequence lengths differentiate between high-level taxonomic groups**

125 In total, 769 putative PEPD orthologues were identified in animals (440), plants (122), fungi (72),  
126 archaea (42), and bacteria (93) (Supplementary File 1). PEPD orthologues in animals revealed an  
127 average sequence length of 493 amino acids (aa), while plants and fungi orthologues had an average  
128 sequence length of 499 aa and 507 aa, respectively (Supplementary File 2). Compared to these three  
129 kingdoms, PEPD sequences of bacteria were slightly smaller with an average sequence length of 455  
130 aa. However, PEPD orthologues identified in archaea showed the smallest average sequence length of  
131 a kingdom with 360 aa. These findings matched previous reports of 349 aa (*P. furiosus*) and 493 aa  
132 (*H. sapiens*)<sup>11,17</sup>. In general, our observations indicate that PEPD sequence length has changed during  
133 evolution. This length difference could be due to an increase of complexity and functionality of PEPD  
134 in eukaryotes, where it is known as a multifunctional enzyme<sup>2</sup>, or due to a loss of domains in  
135 prokaryotes. Observing longer version in eukaryotes is not surprising, because eukaryotes are probably  
136 more likely to tolerate larger proteins than bacteria due to differences in the relative metabolic  
137 burden<sup>43</sup>.

138

### 139 **Analysis of previously described residues**

140 Our broad taxonomic sampling captured vast natural diversity, which was harnessed to identify highly  
141 conserved residues. From conservation of amino acid residues over billions of years during evolution,  
142 we infer functional relevance. A huge diversity of different species and thus sequences is key to  
143 distinguish relevant residues from the phylogenetic background. To ensure an accurate alignment of  
144 all analysed sequences, the alignment was performed with permutations of the input sequences and

145 repeated with different alignment tools. The average difference per position in the resulting  
 146 alignments is low (Supplementary File 3 and 4).

147

### 148 Conservation of functional and structural relevant residues

149 Highly conserved residues are likely to have a high functional, and/or structural relevance. Aiming to  
 150 extend the knowledge about the already existing crystal structure of especially human PEPD, we  
 151 analysed the conservation degree of known residues relevant for the structure and function of PEPD  
 152 <sup>17</sup>. Despite the high diversity of metal ions accepted by different species <sup>2</sup>, the amino acids responsible  
 153 for the binding of the metal ions (D276, D287, H370, E412, and E452) are highly conserved across  
 154 species (Supplementary File 5). All residues reported for the interaction with metal ions were detected  
 155 in over 90% of all sequences. Sequences without these particular residues are likely to be partial and  
 156 thus not covering this position leading to a lower observed conservation value. When excluding  
 157 sequence gaps, almost 100% match is reached for all five positions. Based on these results, we  
 158 conclude that all selected sequences are *bona fide* prolidases. This finding marks the conservation of  
 159 these five residues as one important structural and functional characteristic of PEPD (Figure 1).

|      |         |        |       |         |          |
|------|---------|--------|-------|---------|----------|
| D276 | 94      | 99     | 100   | 100     | 100      |
| D287 | 94      | 98     | 100   | 100     | 100      |
| H370 | 94      | 98     | 100   | 100     | 100      |
| E412 | 94      | 96     | 100   | 100     | 100      |
| E452 | 91      | 97     | 100   | 100     | 100      |
| T289 | 94      | 97     | 100   | 100     | 97       |
| T410 | 93      | 96     | 100   | 79      | 100      |
| H377 | 94      | 98     | 100   | 100     | 97       |
| R398 | 93      | 98     | 89    | 10      | 57       |
| W107 | 88      | 98     | 96    | 0       | 96       |
| Y241 | 94      | 96     | 100   | 2       | 90       |
| I244 | 93      | 98     | 97    | 88      | 100      |
| H255 | 94      | 98     | 100   | 100     | 100      |
| V376 | 89      | 1      | 38    | 81      | 94       |
| C58  | 58      | 64     | 0     | 0       | 0        |
| C158 | 40      | 1      | 0     | 0       | 0        |
|      | Animals | Plants | Fungi | Archaea | Bacteria |

160

161 **Figure 1: Heatmap of reported functionally important residues of PEPD.** The conservation degree of reported  
 162 residues important for PEPD functionality and structure is displayed in percentage across species. Each column

163 represents a kingdom, while the rows display the analysed residue and its corresponding position in the human  
164 PEPD amino acid sequence. A dark green background indicates high conservation, while white means no  
165 conservation.

166 Additionally, strong conservation of T289 and T410 in proximity to the manganese ions supports  
167 previous reports and hypotheses of their functional relevance in PEPD <sup>22</sup>.

168 Nevertheless, one plant- and three animal PEPD orthologues showed an amino acid substitution of one  
169 metal binding residue: *Ancylostoma ceylanicum* (H370V), *Arachis duranensis* (D287N), *Oncorhynchus*  
170 *kisutch* (E452K) and *Tetraodon nigroviridis* (E452R). Crystal structures and enzyme assays could  
171 illuminate the consequences of these substitutions thus providing natural sequences to assess the  
172 contribution of each residue. Since D287N was reported before as a probably deleterious substitution  
173 <sup>44</sup>, these prolidases may have lost their ability to cleave X-P dipeptides.

174 Another essential step for the enzymatic catalysis of prolidases is the binding of their dipeptide  
175 substrate (e.g. G-P)<sup>17</sup>. For example, H255 binds to the carboxylate group of the C-terminal proline  
176 residue of the substrate and its side chain moves upon substrate binding by about 6 Å<sup>o</sup> narrowing down  
177 the size of the active site <sup>17</sup>. The importance of such substrate binding residues, like H255 and H377 <sup>17</sup>,  
178 was validated through a high conservation degree of minimum 94% in all living organisms (Figure 1).  
179 Interestingly, another residue involved in G-P binding in human PEPD, R398 <sup>17</sup>, is highly conserved  
180 except in archaea (Figure 1). Besides its role in G-P binding, this residue is also important for the  
181 specificity of PEPD for dipeptides by determining the length of the ligand at the C-terminus through its  
182 large side chain <sup>16,17</sup>. These results suggest that the majority of analysed archaeal prolidases might not  
183 be capable of G-P degradation and may have a broader substrate spectrum due to the missing R398.  
184 In line with the hypotheses, Ghosh *et al.* showed that PEPD purified from the archaeon *P. furiosus*  
185 revealed no substrate specificity for G-P, but for longer substrates like K-W-A-P and P-P-G-F-S-P,  
186 although this specificity was rather weak <sup>11</sup>. However, the preferred substrates of this enzyme were  
187 the dipeptides M-P and L-P <sup>11</sup>. Interestingly, *P. furiosus* still has a corresponding arginine residue at the  
188 position 295 <sup>16</sup>. This R295 was reported to have dual functionality for cleaving di- and tripeptides due  
189 to the intermediate position of this arginine <sup>16</sup>. These reports support the hypothesis that archaeal  
190 prolidases have a broader substrate spectrum compared to the prolidases of the other kingdoms. In  
191 turn, the strong conservation of R398 in eukaryotes may indicate an adaptation to the specific  
192 recognition of dipeptides. In line with the hypothesis, the bulky side chain of R398 was reported to  
193 prevent the acceptance of tripeptides <sup>17</sup>. Moreover, a strong conservation of W107, except in archaea,  
194 was identified (Figure 1). After G-P binding, W107 is shifted inwards to the active site, sealing the active  
195 site <sup>17</sup>. The low conservation of W107 in archaea suggests that archaeal prolidases might use a different  
196 conformational change, probably due to their putative expanded substrate spectrum.

197 Furthermore, some residues were reported to be involved in the interaction of L-P, another potential  
198 prolidase substrate: Y241, I244, H255, and V376<sup>17</sup>. H255 and I244 are highly conserved across species  
199 (Figure 1). V376 is less conserved in fungi and not conserved in plants. Y241 is not conserved in archaea.  
200 Since *P. furiosus* PEPD is capable of binding and degrading L-P, Y241 is probably not essential for this  
201 binding process in archaea. Another reason for the flexibility in archaea might be the putatively  
202 expanded substrate spectrum due to the absence of Y241, which is reported to close the active site on  
203 the side where the N-terminus of the substrate is placed<sup>21</sup>. To the best of our knowledge, the effect  
204 of the absence of V376 in plants was not investigated yet.

205 In order to identify a common disulfide bond responsible for the common dimer formation of  
206 prolidases previously reported cysteine residues<sup>17</sup> were analysed. In human PEPD an intramolecular  
207 disulfide bridge was observed between C58 from chain A and C158 from chain B<sup>17</sup>. However, this bond  
208 was only present in the inactive (Mn<sup>2+</sup> free) enzyme complex, while the substrate was bound in the  
209 active site<sup>17</sup>. These amino acids are weakly conserved in the animal kingdom (58% and 40%  
210 respectively), but showed an almost complete conservation among vertebrata likely due to their  
211 relevance in the dimer formation in this group. However, these cysteines might not be responsible for  
212 the dimer formation in the active form of the enzyme, which occurs in most of the prolidases<sup>8,17,45</sup>.  
213 Therefore, we aimed to identify a better candidate for this common PEPD conformation. However, we  
214 could not identify a highly conserved cysteine across species, suggesting (I) the presence of different  
215 interactions for stabilization of e.g. PEPD dimers or (II) frequent occurrence of PEPD as a monomer.  
216

### 217 **Analysis of residues known to be mutated in prolidase deficiency**

218 The majority of amino acids that are hot spots causing PD (6/11: D276, G278, L368, E412, G448, G452)  
219 are localised near or in the active side of PEPD<sup>22,46</sup>. These amino acids are conserved across species,  
220 thus suggesting a negative correlation between the distance of a residue to the active site and its  
221 conservation in animals. As expected, highly conserved (>85%) residues are more likely to be located



222 close to the active site (p-value= 3.76e-06, Mann-Whitney U test)(Figure 2, Supplementary File 6).

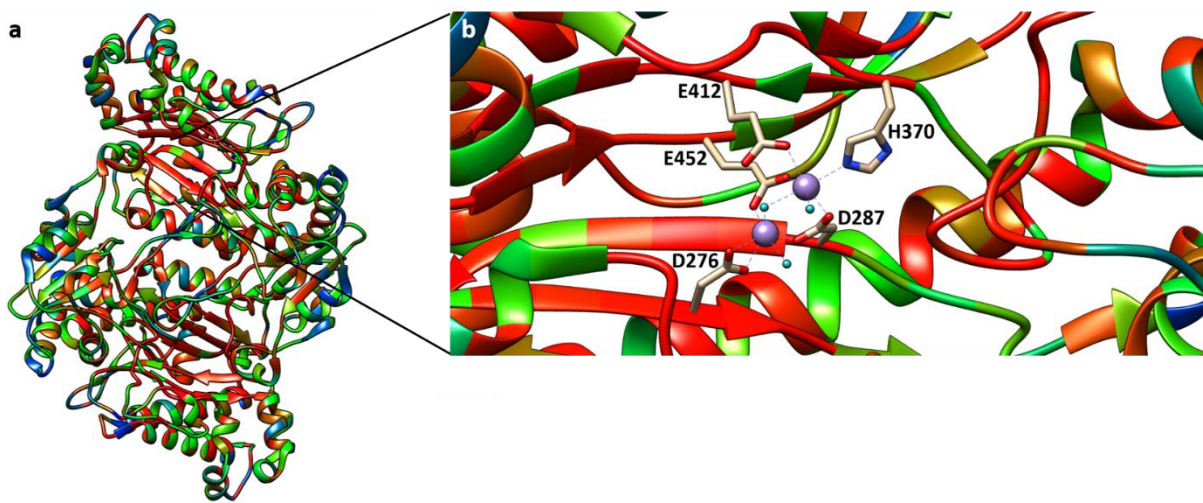

223

224 **Figure 2: The catalytic cavity is highly conserved in the animal kingdom.** (a) Three dimensional heatmap of  
225 residue conservation degree in the animal kingdom, represented by the PEPD structure of human prolidase  
226 (5M4G). The colour scale ranges from red (highly conserved residues) over orange and green to blue (weakly  
227 conserved residues). (b) Conservation degree of the catalytic site of human PEPD. The metal binding residues  
228 (D276, D287, H370, E412, and E452) are shown together with the bound Mn<sup>2+</sup> ions (violet) and water molecules  
229 (cyan).

230 As mentioned previously the metal binding residue E452 is highly conserved across species and its  
231 deletion results surprisingly in a preservation of the active site <sup>21</sup>, likely because it can be replaced by  
232 neighbouring residues. However, the mutated protein shows less than 5% of the WT activity <sup>47</sup>  
233 supporting our findings. Additionally, our results are in line with findings of Bhatnager and Dang, who  
234 identified the mutation of D276N, G278D, E412K, and G448R as damaging substitutions <sup>44</sup>, because we  
235 observed a strong conservation of all four residues. Recently the structural basis of these and other PD  
236 mutations have been analysed in detail <sup>21</sup>. Once again in accordance with our results, Wilk *et al.* claimed  
237 that the D276N mutation results in an excessive reduction of the PEPD activity due to the loss of one  
238 of the catalytic metal ions derived from the charge change caused by the substitution <sup>21</sup>. Similarly, in  
239 the G278D mutant the loss of one metal ion and additional enhanced disorder were observed <sup>21</sup>.  
240 Interestingly, the previously as highly conserved identified Y241 seems to have high functional  
241 relevance since its displacement in this mutant results in a destabilization of two metal binding  
242 residues (D276 and D287)<sup>21</sup>. In addition, the highly conserved substrate coordinating residue H255 is  
243 completely absent from the active site of the G278D mutant <sup>21</sup> stressing its importance in maintaining  
244 PEPD functionality. H255 is also absent in the G448R mutant contributing to a dysfunctional protein  
245 core <sup>21</sup>. The substitution of the metal binding E412 to K results once again in the loss of one metal ion  
246 by an amino acid side chain leading to PEPD inactivation <sup>21</sup>.

247 R184 is defined by the shortest atom-to-atom distance to G-P in human PEPD and marks the end of  
248 the N-terminal chain of human PEPD <sup>21</sup>. The deletion or mutation of R184 to Q in PD patients results in  
249 an inactive PEPD or one with highly reduced enzyme activity, respectively <sup>21</sup>. Therefore, R184 might be  
250 essential for the functionality and structure of PEPD, which is supported by its high conservation across  
251 many species <sup>22</sup>. In this study, this finding was validated with a minimum conservation degree of 92%  
252 of all sequences analysed. Moreover, D375 and D378 were identified as highly conserved across  
253 species. Interestingly, these residues were both recently reported to directly interact with R184 <sup>21</sup>. In  
254 the PD mutation variant R184Q, the interaction between R184 with D375 and D378 is lost, due to the  
255 replacement of the positive charged guanidinium group of R184 to the neutral amide group of Q <sup>21</sup>. The  
256 resulting protein shows only residual activity, supporting the hypothesis that D375 and D378 are highly  
257 important for PEPD functionality.

258 Additional relevant residues in PD are not particular conserved across different phyla. Among them  
259 are S202 (90%) and Y231 (89%) highly conserved in animals. While the deletion of Y231 results in  
260 alterations in the dimer interface with remaining PEPD activity, the S202F substitution increases PEPD  
261 disorder resulting in the inability to hydrolyse G-P <sup>21</sup>. Y241 is affected by S202F contributing to loss of  
262 PEPD activity, since Y becomes disordered even though all other metal binding residue are not affected  
263 <sup>21</sup>. Since Y241 interacts in the WT human PEPD structure with the metal binding aspartates <sup>21</sup>, its  
264 disorder might result in the loss of this interaction, thus destabilizing PEPD. However, A212 (45%) and  
265 R265 (35%) show a substantially smaller conservation degree compared to S202 and Y231. Strong  
266 conservation of A212 and R265 is limited to vertebrates thus suggesting a pathogenic role limited to  
267 this branch. The phenotype of S202P, A212P, and L368R are not distinguishable from each other,  
268 posing an example for relevant residues in PD without strong conservation <sup>46</sup>.

269

## 270 **Identification of polymorphisms in damage-associated SNPs in human prolidase gene**

271 Recently, Bhatnager and Dang (2018), identified damage associated single-nucleotide polymorphisms  
272 (SNPs) in human prolidase gene based on a comprehensive *in silico* analysis <sup>44</sup>. We observed that some  
273 of their non-synonymous SNPs are leading to substitutions at variable positions thus qualifying as  
274 polymorphisms instead of pathogenic variants. Such a SNP is causing the substitution of V to I at  
275 position 305, while our analysis revealed V in 78% and I in 16% of all animal PEPD sequences. Six out  
276 of seven tools predicted this SNP as neutral, supporting our assumption <sup>44</sup>. Similar ratios and even  
277 dominance of a different amino acid were observed for I45V, E227L, and L435F indicating three

278 additional polymorphisms. Additionally, we hypothesize that nsSNPs leading to T137M, V456M, and  
 279 D125N are likely to be polymorphisms as the conservation of the canonical amino acid is low.

280 However, the remaining nsSNPs showing a higher conservation degree in the animal kingdom indicate  
 281 that they may be important for structure or function of PEPD in the animal kingdom and that  
 282 substitutions of these residues have a pathogenic potential <sup>44</sup>. This is especially the case for the  
 283 overlaps of the identified consensus nsSNPs, which were predicted from all tools as damage  
 284 associated, with our results stressing that these residues are highly conserved not only in the animal  
 285 kingdom, but also across species <sup>44</sup>(Table 1).

286 **Table 1: Conservation degree across species for positions, which were reported to be derived from damage-**  
 287 **associated nsSNPs.** The conservation degree of positions, which were reported to be derived from  
 288 damage-associated nsSNPs are stated for animals (An), plants (Pl), fungi (Fu), bacteria (Ba) and archaea (Ar). The  
 289 first column contains the position of each amino acid based on the human PEPD sequence (Reference sequence  
 290 position, RSP; UniProt ID: P12955). The amino acid frequency (AAF) ranging from 0 to 1 (1=100% conserved) of  
 291 the most abundant (1) and second abundant (2) amino acid at a certain position is listed. Gaps in the alignment  
 292 are indicated through a “-” followed by the conservation degree in the kingdom. Only a “-” is given, when the  
 293 first amino acid is 100% conserved.

| RSP | An AAF1 | An AAF2 | Pl AAF1 | Pl AAF2 | Fu AAF1 | Fu AAF2 | Ba AAF1 | Ba AAF2 | Ar AAF1 | Ar AAF2 |
|-----|---------|---------|---------|---------|---------|---------|---------|---------|---------|---------|
| 19  | P_0.71  | S_0.18  | P_0.73  | -_0.1   | P_0.97  | D_0.01  | -_0.62  | P_0.26  | -_1.0   | -       |
| 35  | R_0.51  | K_0.24  | R_0.76  | -_0.06  | L_0.31  | R_0.17  | P_0.37  | A_0.22  | E_0.25  | Y_0.1   |
| 188 | T_0.73  | S_0.2   | S_0.89  | T_0.08  | D_0.82  | T_0.1   | D_0.5   | T_0.43  | D_0.63  | E_0.13  |
| 192 | L_0.67  | I_0.25  | L_0.8   | I_0.14  | I_0.64  | V_0.19  | I_0.38  | L_0.34  | I_0.5   | L_0.38  |
| 224 | S_0.81  | A_0.11  | S_0.95  | A_0.02  | A_0.92  | G_0.06  | G_0.28  | L_0.25  | A_0.43  | G_0.2   |
| 240 | S_0.84  | A_0.08  | S_0.90  | -_0.02  | A_0.38  | G_0.35  | P_0.44  | G_0.4   | S_0.48  | A_0.48  |
| 247 | S_0.79  | T_0.13  | T_0.89  | S_0.07  | S_0.74  | A_0.21  | L_0.41  | S_0.24  | S_0.45  | F_0.38  |
| 255 | H_0.94  | -_0.05  | H_0.98  | -_0.02  | H_1.0   | -       | H_1.0   | -       | H_1.0   | -       |
| 276 | D_0.94  | -_0.05  | D_0.99  | -_0.01  | D_1.0   | -       | D_1.0   | -       | D_1.0   | -       |
| 278 | G_0.94  | -_0.06  | G_0.99  | -_0.01  | G_0.97  | A_0.03  | G_0.99  | T_0.01  | G_0.95  | T_0.05  |
| 287 | D_0.94  | -_0.05  | D_0.98  | -_0.02  | D_1.0   | -       | D_1.0   | -       | D_1.0   | -       |
| 296 | G_0.94  | -_0.05  | G_0.98  | -_0.02  | G_0.97  | T_0.01  | G_0.62  | S_0.19  | G_0.45  | -_0.18  |
| 373 | G_0.94  | -_0.06  | G_0.98  | -_0.02  | G_1.0   | -       | G_1.0   | -       | G_1.0   | -       |
| 378 | D_0.93  | -_0.05  | D_0.98  | -_0.02  | D_1.0   | -       | D_0.94  | E_0.06  | E_0.85  | D_0.15  |
| 403 | L_0.80  | V_0.12  | L_0.96  | -_0.02  | L_0.94  | V_0.04  | L_0.78  | I_0.15  | L_0.85  | I_0.13  |
| 410 | T_0.93  | -_0.06  | T_0.96  | -_0.02  | T_1.0   | -       | T_1.0   | -       | T_0.78  | S_0.23  |
| 412 | E_0.94  | -_0.06  | E_0.96  | -_0.02  | E_1.0   | -       | E_1.0   | -       | E_1.0   | -       |
| 447 | G_0.93  | -_0.07  | G_0.97  | -_0.03  | G_1.0   | -       | G_0.53  | -_0.4   | F_0.6   | G_0.25  |
| 448 | G_0.93  | -_0.06  | G_0.97  | -_0.03  | G_1.0   | -       | G_1.0   | -       | G_1.0   | -       |

294

## 295 **PEPD in cancer**

296 The investigation of curated SNPs in *PEPD*, which are associated with specific cancer types (BioMuta  
297 database <sup>49</sup>), revealed missense mutations in various cancer types to be distributed across the whole  
298 *PEPD* sequence (Supplementary File 7). As many SNPs were associated with a low frequency, we  
299 focused on a small set of more frequent ones. Surprisingly, the amino acid affected by the most  
300 frequent SNPs in various cancer types is A74, a residue located in the non-catalytic N-terminal domain.  
301 While the general frequency in animals is low (38%), it displays a strong conservation in mammals thus  
302 suggesting a functional role. Other frequently effected residues are A122, H155, G257, R311, M329,  
303 and D378. All of them are conserved to different extents in the animal kingdom, while three (G257,  
304 M329, and D378) are also conserved in plants. However, D378 is the only amino acid conserved across  
305 all species. Being in proximity to the metal binding residue H370, the high conservation degree of D378  
306 might be due to its role in forming a functional catalytic site. However, we could not identify a “cancer  
307 specific hot spot residue” in the animal kingdom and thus the appearance of SNPs in *PEPD* in various  
308 cancer types is likely not to be the driving force of a specific cancer type and the identified SNPs might  
309 be polymorphisms.

310

## 311 **Post-translational regulation of PEPD**

312 Since there is experimental evidence of PEPD activity being regulated at the post-translational level  
313 through phosphorylation <sup>41,42</sup>, we aimed to validate previously predicted post-translational  
314 modifications (PTMs) <sup>50</sup> in human PEPD. None of the examined sites were highly conserved across  
315 species (Supplementary File 5), which could be explained by differences in the PTM mechanisms  
316 between prokaryotes and eukaryotes <sup>51,52</sup>. Nevertheless, some residues were conserved in the animal  
317 kingdom e.g. R196 (88%). The low conservation values could be due to differences in PTMs between  
318 different groups of eukaryotes <sup>51</sup>. The lack of conservation for some of these residues (S8, K36, S113,  
319 T487, A490, K493) could be explained in three ways: (I) no strong functional relevance for PEPD, (II)  
320 false positive prediction, or (III) a human specific regulation system. *Vice versa*, three residues are  
321 highly conserved at least in the animal kingdom (T15:80%, Y128:78%, R196:88%) posing good  
322 candidates for a PTM site. Two of the three amino acids are predicted to be phosphorylated (T15 and  
323 Y128), while R196 is thought to be monomethylated <sup>50</sup>.

324 Lupi *et al.* predicted putative PTMs at N13, N172 (NetNGly), and T458 (NetOGlyc) <sup>22</sup>. These residues  
325 were found to be highly conserved among vertebrates. This situation could be explained by a more  
326 recently evolved function or a relaxed ancestral function in species without strong conservation. *In*

327 *silico* prediction of new phosphorylation sites resulted in T90, S113, Y121, Y128, S202, S224, S138,  
328 S240, S247 and S460 as best candidates. Conservation degrees generally support these predictions  
329 (Supplementary File 5) and distribution across species suggests a more recently increased relevance of  
330 S113 and S138.

331

### 332 **Identification of novel conserved residues**

333 All structure related observation and hypothesis are based on human prolidase crystal structure (PDB:  
334 5M4G). As we already validated through the correlation in the animal kingdom, highly conserved  
335 residues are located nearby or in the substrate binding site. Therefore, it was not surprising that  
336 residues near the metal binding residue E452 are highly conserved across species especially R450:92%  
337 along with the previously reported G448:93%. The side chain of R450 is near the metal binding site,  
338 indicating that it might be essential for the formation of a functional metal ion binding site  
339 (Supplementary File 8 (a)). Another two conserved residues, T458 and G461, are located in the curve  
340 of a C-terminal loop near the binding site (Supplementary File 8 (b)). The small size of these amino  
341 acids might be necessary to form this structural feature. However, T458 could be a putative  
342 phosphorylation site. Since it is located on the outer surface of the enzyme, it is accessible for  
343 modifications. Additionally, we observed a cluster of highly conserved residues (G406-V408), which  
344 are part of the pita-bread structure, stressing the importance of this fold for the function of PEPD as  
345 metalloproteinase.

346 Again, highly conserved residues across species were identified near another known metal binding  
347 residue E412: Y416:94%, P413:94%, and G414:93% are located near the active site and are therefore  
348 good candidates for generating a functional binding site. The glycine and proline seem to be important  
349 to allow the proper arrangement of the metal binding residues by providing space between them. The  
350 side chain of Y416 is pointing into the active side, indicating it might have an additional functional role  
351 (Figure 3 (a)).

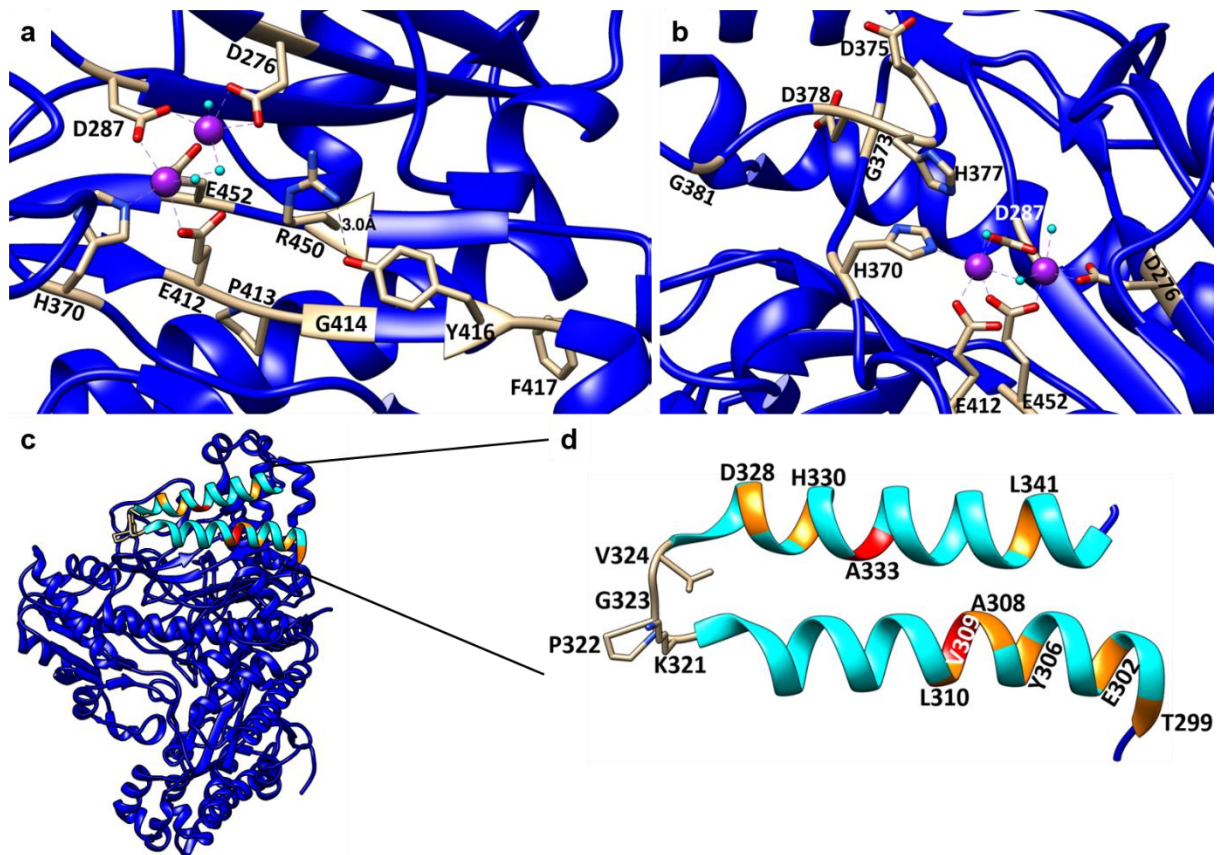

352

353 **Figure 3: Novel highly conserved residues with functional and/or structural importance in PEPD.** The ribbon of  
354 the human PEPD 3D model is shown in blue, while residues of interest are lettered. The metal ions are shown in  
355 violet and water molecules are shown in cyan. (a) Highly conserved residues P413, G414, and Y416 are located  
356 near the metal binding residue E412 and are likely to be involved in generating a functional binding cavity. Y416  
357 might stabilize the anti-parallel  $\beta$ -strand through interaction with R450. (b) G373, D375, D378, and G381 are  
358 involved in the stabilization of the loop, which results in an optimal position of the substrate-binding residue  
359 H377. (c) Peripheral localisation of the helix with highly conserved residues. (d) The peripheral helix contains two  
360 highly conserved residues (A333 and V309), which are marked in red and other conserved residues, which are  
361 marked in orange. Moreover, residues building the loop (V324, G323, P322, and K321) are conserved, too.

362 However, it is more likely that it has a stabilizing effect building a hydrogen bond with the NH group of  
363 R450:92% (Figure 3 (a)) thus stabilizing the anti-parallel  $\beta$ -strand. This anti-parallel  $\beta$ -strand seems to  
364 be highly important for PEPD functionality, since substitutions in the parallel  $\beta$ -strand e.g. G447R or  
365 G448R were reported to null PEPD activity<sup>44</sup>. The insertion of a bulky arginine side chain, which  
366 prevents the correct assembly of the  $\beta$ -sheet, could be the explanation<sup>44</sup>. Furthermore, F417:82% is  
367 highly conserved in every kingdom except archaea, expanding the number of conserved residues in  
368 this conserved region (Figure 3 (a)).

369 The conserved G373 is located in a tied turn of the peptide chain, suggesting its interplay with the  
370 conserved residues D375, D378, and G381 to form a loop. As a result, the important dipeptide-binding  
371 residue H377 is placed near the catalytic site (Figure 3(b)). Weak conservation of these residues in

372 archaea vindicates the previously mentioned hypothesis that archaea PEPD might be able to hydrolyze  
373 a broader substrate spectrum. Additionally, we identified the two conserved residues G369 and H366  
374 near the metal binding residue H370 (Supplementary File 8 (c)). The side chain of H366 is pointing into  
375 the active site, indicating that it will narrow down the active site, therefore contributing to substrate  
376 specificity. Interestingly, residues near H366 e.g. P365, G367, and L368 are highly conserved with  
377 exception of the archaea kingdom. This could explain the ability of archaeal prolidases to process  
378 tripeptides in addition to dipeptides.

379 The highly conserved residues T299, E302, Y306, A308, V309, L310, K321, P322, G323, V324, D328,  
380 H330, and L341 form two parallel helices located in the periphery of PEPD, thus exposed to the solvent  
381 (Figure 3 (c)). Based on their extremely high conservation, V309 and A333 are probably most important  
382 for this structure (Figure 3 (d)). Whether this region could be the cause for some of extracellular  
383 functions of PEPD, e.g. EGFR or ErbB2 binding<sup>33,34</sup> or might be a target for a regulatory protein, needs  
384 to be investigated in the future.

385 Moreover, T299, F298, G296, and P293 are highly conserved across species except archaea. These  
386 residues might stabilize the pita-bread fold by strengthening a loop near the catalytic site  
387 (Supplementary File 8 (d)). Additionally, near the metal binding residue D276, some amino acids  
388 display strong conservation including G278, G270, E280, and L274.

389 Interestingly, investigation of residues near the highly conserved H255 revealed an exclusive  
390 conservation of the region between L257 and A259 in animals and plants. It is located in a loop  
391 structure at the periphery of PEPD. This region and other similar observations e.g. G385, V386, M236,  
392 G149, N151, T152, Q49, and G50 indicating that plant and animal prolidases might have distinct  
393 structural features compared to archaea, bacteria, and fungi. However, the flanking amino acids of  
394 H255 are highly conserved at a minimum of 94% in animals, plants and fungi, stressing its importance  
395 in eukaryotes.

396 Overall, we observe more conserved residues in the C-terminal catalytic region compared to the N-  
397 terminal region. Nevertheless, P98, L95, P80, G76, and F65 are examples for conserved residues in the  
398 N-terminal part. Their functions are yet to be determined.

399

#### 400 **Limitations and perspectives**

401 Numerous PEPD orthologues were identified across all living organisms to pinpoint key residues in this  
402 protein. The selection of sequences from different groups is not balanced and we do not attempt to

403 assign evolution events to certain groups, which would be possible based on an even more  
404 comprehensive sample. A high natural diversity allowed us to distinguish between variable positions  
405 with low if any functional relevance and highly conserved residues, which are likely to play key  
406 catalytic, structural, or regulatory roles in PEPD. The results match previously reported residues and  
407 enabled us to identify additional residues, which should be subjected to in-depth investigation and will  
408 eventually shed light on function and structure of PEPD. However, 264 (27%) of the screened data sets  
409 did not reveal a PEPD candidate based on our bait sequences. A majority of species without PEPD  
410 candidates (175) were bacteria (Supplementary File 9). Since PEPD is a relevant enzyme at least in  
411 eukaryotes, it is unlikely to be missing in many species. Technical limitations like incomplete assemblies  
412 or annotations could be the reasons for the absence of PEPD from some data sets. Therefore, we  
413 checked the completeness of all analysed data sets through the identification of suitable benchmarking  
414 genes that are assumed to be present in the respective species (Supplementary File 9) and discussed  
415 it in detail (Supplementary File 10). The identification of additional PEPD orthologues would facilitate  
416 further analyses e.g. improve the differentiation between pathogenic substitutions and harmless  
417 polymorphisms. We used our observations to predict the functional impact of nsSNPs and expect that  
418 this approach will be useful in the future for similar applications. We anticipate that the use of *in silico*  
419 tools integrating evolutionary genetics and structural data available will help to gain knowledge e.g.  
420 regarding the molecular characterization of PEPD, the identification of new regulatory residues, the  
421 extracellular role of PEPD, and new therapeutic strategies against prolidase deficiency and other PEPD  
422 associated disorders.

423



## 424 **Material and methods**

### 425 **Data set collection**

426 The peptide sequence sets of 475 animals, 122 plants, 72 fungi, 49 archaea, and 236 bacteria were  
427 retrieved from the NCBI. All sequences were pre-processed with a dedicated Python script to generate  
428 customized data files mainly with adjusted sequence names as long sequence names can pose a  
429 problem to some alignment tools (<https://github.com/bpucker/PEPD>). Next, peptide sequence sets  
430 were subjected to BUSCO v3<sup>53</sup> to assess their completeness based on the reference sequence sets  
431 ‘metazoa odb9’ (animals), ‘embryophyta odb9’ and ‘eukaryota odb9’ (plants), ‘eukaryote odb9’ (fungi),  
432 and ‘bacteria odb9’ (bacteria). Since there is no dedicated reference sequence set available for  
433 archaea, we used the eukaryota and bacteria sets. PEPD bait sequences (Supplementary File 11 and  
434 12) were selected manually based on the literature and/or curated UniProt entries<sup>8,36</sup>. Initial selection  
435 of related sequences was based on a pipeline combining previously published scripts and using their  
436 default parameters<sup>54</sup>. Candidate sequences were identified in a sensitive similarity search by SWIPE  
437 v2.0.12<sup>55</sup> and filtered through iterative steps of phylogenetic analyses involving MAFFT v7.299b<sup>56</sup>,  
438 phyx<sup>57</sup>, and FastTree v2.1.10<sup>58</sup>. Results were manually inspected and polished to identify *bona fide*  
439 orthologous genes with a high confidence. As the average length of PEPD in animals and plants is  
440 around 500 amino acids, sequences outside the range 200-700 amino acids were filtered out to avoid  
441 bias in downstream analyses through partial sequences or likely annotation artefacts.

442

### 443 **Identification and investigation of conserved residues**

444 MAFFT v.7.299b<sup>56</sup> was applied for the generation of multiple sequence alignments. Resulting  
445 alignments were cleaned by removal of all alignment columns with less than 30% occupancy.  
446 Conserved residues were identified and listed based on positions in the human PEPD sequence  
447 (UniProt ID: P12955) using the Python script ‘conservation\_per\_pos.py’ (Supplementary File 1). This  
448 analysis was repeated 50 times with randomly reshuffled sequences as the order of sequences can  
449 heavily impact the alignment process<sup>59</sup>. In addition, we compared the alignments generated by MAFFT  
450 v.7.299b to ClustalO v.1.2.4<sup>60</sup> and MUSCLE v.3.8.31<sup>61</sup> alignments of the same data sets. The alignment  
451 bias through the order of input sequences was quantified for all positions of the aligned *Homo sapiens*  
452 sequence. For the *in silico* prediction of phosphorylation sites the *H. sapiens* PEPD sequence (UniProt  
453 ID: P12955) was submitted to NetPhos 3.1<sup>62,63</sup>. Only the best prediction for each residue with a high  
454 confident score of >0.8 was considered for further analyses.

## 455 **Sources of previously reported data**

456 Previously reported residues with functional implications (Supplementary File 7) were checked for  
457 conservation. Additionally, the alignment was screened for highly conserved residues to the best of  
458 our knowledge not previously reported in respect to functionality or structure of PEPD. The results of  
459 the residue conservation analysis for the animal kingdom were mapped to a 3D structure of human  
460 PEPD (PDB: 5G4M). Putative post-translational modification sites were obtained from PhosphoSitePlus  
461 and literature <sup>22,50</sup>. Residues associated with PD were retrieved from literature <sup>22,46</sup>. Non-synonymous  
462 single-nucleotide polymorphisms (nsSNPs) <sup>44</sup> and details about observations were retrieved from the  
463 curated BioMuta database <sup>49</sup>.

464

## 465 **Correlation analysis of conservation degree and distance to the active site of PEPD**

466 To determine the conservation degree in correlation to the distance to the active site, the average  
467 localisation of the five metal binding residues was identified and used to calculate the distance of each  
468 residue to this focus of the catalytic site (Supplementary File 13). Information about the position of  
469 each residue was taken from the PDB file 5M4G of human PEPD <sup>17</sup>. The Python modules matplotlib <sup>64</sup>  
470 and seaborn (<https://github.com/mwaskom/seaborn>) were applied to construct a conservation  
471 heatmap. In addition, the conservation of all residues in animals was mapped to the 3D model of the  
472 human PEPD by assigning colours within a colour gradient to each amino acid representing its  
473 conservation among animal sequences.

474

## 475 **Phylogenetic analysis**

476 A phylogenetic tree was constructed via FastTree v.2.1.10 <sup>58</sup> based on alignments generated via MAFFT  
477 v.7.299b <sup>56</sup> and trimmed via pxclsq <sup>57</sup> to a minimal occupancy of 60%. The conservation of different key  
478 residues was mapped to this tree for visualization. A Python script (<https://github.com/bpucker/PEPD>)  
479 was deployed to colour all leaves representing sequences with the conserved residue in red.

480

## 481 **Data Availability**

482 All data generated or analysed during this study are included in this published article (and its  
483 Supplementary Information files).

## 484 References

- 485 1. Bergmann, M. & Fruton, J. On proteolytic enzymes. XII. Regarding the specificity of  
486 aminopeptidases and carboxypeptidases. A new type of enzyme in the intestinal tract. *J. Biol.*  
487 *Chem.* **177**, 189–202 (1937).
- 488 2. Kitchener, R. I. & Grunden, A. m. Prolidase function in proline metabolism and its medical and  
489 biotechnological applications. *J. Appl. Microbiol.* **113**, 233–247 (2012).
- 490 3. Davis, N. C. & Smith, E. L. Purification and some properties of prolidase of swine kidney. *J. Biol.*  
491 *Chem.* **224**, 261–275 (1957).
- 492 4. Baksi, K. & Radhakrishnan, A. N. Purification and properties of prolidase (imidodipeptidase) from  
493 monkey small intestine. *Indian J. Biochem. Biophys.* **11**, 7–11 (1974).
- 494 5. Browne, P. & O’Cuinn, G. The purification and characterization of a proline dipeptidase from  
495 guinea pig brain. *J. Biol. Chem.* **258**, 6147–6154 (1983).
- 496 6. Endo, F., Hata, A., Indo, Y., Motohara, K. & Matsuda, I. Immunochemical analysis of prolidase  
497 deficiency and molecular cloning of cDNA for prolidase of human liver. *J. Inherit. Metab. Dis.* **10**,  
498 305–307 (1987).
- 499 7. Myara, I., Cosson, C., Moatti, N. & Lemonnier, A. Human kidney prolidase—purification,  
500 preincubation properties and immunological reactivity. *Int. J. Biochem.* **26**, 207–214 (1994).
- 501 8. Jalving, R., Bron, P., Kester, H. C. M., Visser, J. & Schaap, P. J. Cloning of a prolidase gene from  
502 *Aspergillus nidulans* and characterisation of its product. *Mol. Genet. Genomics MGG* **267**, 218–222  
503 (2002).
- 504 9. Johnson, G. L. & Brown, J. L. Partial purification and characterization of two peptidases from  
505 *Neurospora crassa*. *Biochim. Biophys. Acta* **370**, 530–540 (1974).
- 506 10. Kubota, Y., Shoji, S. & Motohara, K. Purification and properties of prolidase for germinating  
507 soybeans. *Yakugaku Zasshi* **97**, 111–115 (1977).

- 508 11. Ghosh, M., Grunden, A. M., Dunn, D. M., Weiss, R. & Adams, M. W. Characterization of native and  
509 recombinant forms of an unusual cobalt-dependent proline dipeptidase (prolidase) from the  
510 hyperthermophilic archaeon *Pyrococcus furiosus*. *J. Bacteriol.* **180**, 4781–4789 (1998).
- 511 12. Booth, M., Jennings, P. V., Nífhailín, I. & O’cuinn, G. Endopeptidase activities of *Streptococcus*  
512 *cremoris*. *Biochem. Soc. Trans.* **18**, 339–340 (1990).
- 513 13. Suga, K. *et al.* Prolidase from *Xanthomonas maltophilia*: Purification and Characterization of the  
514 Enzyme. *Biosci. Biotechnol. Biochem.* **59**, 2087–2090 (1995).
- 515 14. Mikio, F., Yuko, N., Shigeyuki, I. & Toshio, S. Purification and Characterization of a Prolidase from  
516 *Aureobacterium esteraromaticum*. *Biosci. Biotechnol. Biochem.* **60**, 1118–1122 (1996).
- 517 15. Fernández-Esplá, M. D., Martín-Hernández, M. C. & Fox, P. F. Purification and characterization of  
518 a prolidase from *Lactobacillus casei* subsp. *casei* IFPL 731. *Appl. Environ. Microbiol.* **63**, 314–316  
519 (1997).
- 520 16. Weaver, J., Watts, T., Li, P. & Rye, H. S. Structural Basis of Substrate Selectivity of *E. coli* Prolidase.  
521 *PLOS ONE* **9**, e111531 (2014).
- 522 17. Wilk, P. *et al.* Substrate specificity and reaction mechanism of human prolidase. *FEBS J.* **284**, 2870–  
523 2885 (2017).
- 524 18. Lupi, A. *et al.* Molecular characterisation of six patients with prolidase deficiency: identification of  
525 the first small duplication in the prolidase gene and of a mutation generating symptomatic and  
526 asymptomatic outcomes within the same family. *J. Med. Genet.* **43**, e58 (2006).
- 527 19. Viglio, S. *et al.* The role of emerging techniques in the investigation of prolidase deficiency: from  
528 diagnosis to the development of a possible therapeutical approach. *J. Chromatogr. B Analyt.*  
529 *Technol. Biomed. Life. Sci.* **832**, 1–8 (2006).
- 530 20. Phang, J. M., Liu, W. & Zabirnyk, O. Proline metabolism and microenvironmental stress. *Annu. Rev.*  
531 *Nutr.* **30**, 441–463 (2010).

- 532 21. Wilk, P. *et al.* Structural Basis for Prolidase Deficiency Disease Mechanisms. *FEBS J.* (2018).  
533 doi:10.1111/febs.14620
- 534 22. Lupi, A., Tenni, R., Rossi, A., Cetta, G. & Forlino, A. Human prolidase and prolidase deficiency: an  
535 overview on the characterization of the enzyme involved in proline recycling and on the effects of  
536 its mutations. *Amino Acids* **35**, 739–752 (2008).
- 537 23. Gecit, İ. *et al.* The Prolidase Activity, Oxidative Stress, and Nitric Oxide Levels of Bladder Tissues  
538 with or Without Tumor in Patients with Bladder Cancer. *J. Membr. Biol.* **250**, 455–459 (2017).
- 539 24. Kucukdurmaz, F. *et al.* Evaluation of serum prolidase activity and oxidative stress markers in men  
540 with BPH and prostate cancer. *BMC Urol.* **17**, (2017).
- 541 25. Surazynski, A., Miltyk, W., Palka, J. & Phang, J. M. Prolidase-dependent regulation of collagen  
542 biosynthesis. *Amino Acids* **35**, 731–738 (2008).
- 543 26. Uygun Ilikhan, S. *et al.* Assessment of the correlation between serum prolidase and alpha-  
544 fetoprotein levels in patients with hepatocellular carcinoma. *World J. Gastroenterol. WJG* **21**,  
545 6999–7007 (2015).
- 546 27. Piriñçi, N. *et al.* Serum prolidase activity, oxidative stress, and antioxidant enzyme levels in  
547 patients with renal cell carcinoma. *Toxicol. Ind. Health* **32**, 193–199 (2016).
- 548 28. Demir, S. *et al.* Decreased Prolidase Activity in Patients with Posttraumatic Stress Disorder.  
549 *Psychiatry Investig.* **13**, 420–426 (2016).
- 550 29. Verma, A. K. *et al.* Association of Major Depression with Serum Prolidase Activity and Oxidative  
551 Stress. *Br. J. Med. Med. Res.* **20**, 1–8 (2017).
- 552 30. Du, X., Tove, S., Kast-Hutcheson, K. & Grunden, A. M. Characterization of the dinuclear metal  
553 center of *Pyrococcus furiosus* prolidase by analysis of targeted mutants. *FEBS Lett.* **579**, 6140–6146  
554 (2005).
- 555 31. Phang, J. M., Pandhare, J. & Liu, Y. The Metabolism of Proline as Microenvironmental Stress  
556 Substrate. *J. Nutr.* **138**, 2008S-2015S (2008).

- 557 32. Yang, L., Li, Y., Bhattacharya, A. & Zhang, Y. PEPD is a pivotal regulator of p53 tumor suppressor.  
558 *Nat. Commun.* **8**, 2052 (2017).
- 559 33. Yang, L. *et al.* Prolidase directly binds and activates epidermal growth factor receptor and  
560 stimulates downstream signaling. *J. Biol. Chem.* **288**, 2365–2375 (2013).
- 561 34. Yang, L., Li, Y. & Zhang, Y. Identification of prolidase as a high affinity ligand of the ErbB2 receptor  
562 and its regulation of ErbB2 signaling and cell growth. *Cell Death Dis.* **5**, e1211 (2014).
- 563 35. Are, V. N. *et al.* Crystal structure of a novel prolidase from *Deinococcus radiodurans* identifies new  
564 subfamily of bacterial prolidases. *Proteins Struct. Funct. Bioinforma.* **85**, 2239–2251 (2017).
- 565 36. Maher, M. J. *et al.* Structure of the Prolidase from *Pyrococcus furiosus*. *Biochemistry* **43**, 2771–  
566 2783 (2004).
- 567 37. Bazan, J. F., Weaver, L. H., Roderick, S. L., Huber, R. & Matthews, B. W. Sequence and structure  
568 comparison suggest that methionine aminopeptidase, prolidase, aminopeptidase P, and  
569 creatinase share a common fold. *Proc. Natl. Acad. Sci. U. S. A.* **91**, 2473–2477 (1994).
- 570 38. Lowther, W. T. & Matthews, B. W. Metalloaminopeptidases: common functional themes in  
571 disparate structural surroundings. *Chem. Rev.* **102**, 4581–4608 (2002).
- 572 39. Lowther, W. T. & Matthews, B. W. Structure and function of the methionine aminopeptidases.  
573 *Biochim. Biophys. Acta* **1477**, 157–167 (2000).
- 574 40. Lupi, A. *et al.* Human recombinant prolidase from eukaryotic and prokaryotic sources. Expression,  
575 purification, characterization and long-term stability studies. *FEBS J.* **273**, 5466–5478 (2006).
- 576 41. Surazyński, A., Pałka, J. & Wołczyński, S. Phosphorylation of prolidase increases the enzyme  
577 activity. *Mol. Cell. Biochem.* **220**, 95–101 (2001).
- 578 42. Surazynski, A., Liu, Y., Milytk, W. & Phang, J. M. Nitric oxide regulates prolidase activity by  
579 serine/threonine phosphorylation. *J. Cell. Biochem.* **96**, 1086–1094 (2005).
- 580 43. Lynch, M. & Marinov, G. K. The bioenergetic costs of a gene. *Proc. Natl. Acad. Sci. U. S. A.* **112**,  
581 15690–15695 (2015).

- 582 44. Bhatnager, R. & Dang, A. S. Comprehensive in-silico prediction of damage associated SNPs in  
583 Human Prolidase gene. *Sci. Rep.* **8**, 9430 (2018).
- 584 45. Yoshimoto, T., Matsubara, F., Kawano, E. & Tsuru, D. Prolidase from bovine intestine: purification  
585 and characterization. *J. Biochem. (Tokyo)* **94**, 1889–1896 (1983).
- 586 46. Falik-Zaccai, T. C. *et al.* A broad spectrum of developmental delay in a large cohort of prolidase  
587 deficiency patients demonstrates marked interfamilial and intrafamilial phenotypic variability. *Am.*  
588 *J. Med. Genet. Part B Neuropsychiatr. Genet. Off. Publ. Int. Soc. Psychiatr. Genet.* **153B**, 46–56  
589 (2010).
- 590 47. Ledoux, P., Scriver, C. & Hechtman, P. Four novel PEPD alleles causing prolidase deficiency. *Am. J.*  
591 *Hum. Genet.* **54**, 1014–1021 (1994).
- 592 48. Cechowska-Pasko, M., Pałka, J. & Wojtukiewicz, M. Z. Enhanced prolidase activity and decreased  
593 collagen content in breast cancer tissue. *Int. J. Exp. Pathol.* **87**, 289–296 (2006).
- 594 49. Wu, T.-J. *et al.* A framework for organizing cancer-related variations from existing databases,  
595 publications and NGS data using a High-performance Integrated Virtual Environment (HIVE).  
596 *Database J. Biol. Databases Curation* **2014**, bau022 (2014).
- 597 50. Hornbeck, P. V. *et al.* PhosphoSitePlus, 2014: mutations, PTMs and recalibrations. *Nucleic Acids*  
598 *Res.* **43**, D512-520 (2015).
- 599 51. Deribe, Y. L., Pawson, T. & Dikic, I. Post-translational modifications in signal integration. *Nat. Struct.*  
600 *Mol. Biol.* **17**, 666–672 (2010).
- 601 52. Nussinov, R., Tsai, C.-J., Xin, F. & Radivojac, P. Allosteric post-translational modification codes.  
602 *Trends Biochem. Sci.* **37**, 447–455 (2012).
- 603 53. Simão, F. A., Waterhouse, R. M., Ioannidis, P., Kriventseva, E. V. & Zdobnov, E. M. BUSCO: assessing  
604 genome assembly and annotation completeness with single-copy orthologs. *Bioinforma. Oxf. Engl.*  
605 **31**, 3210–3212 (2015).

- 606 54. Yang, Y. *et al.* Dissecting Molecular Evolution in the Highly Diverse Plant Clade Caryophyllales Using  
607 Transcriptome Sequencing. *Mol. Biol. Evol.* **32**, 2001–2014 (2015).
- 608 55. Rognes, T. Faster Smith-Waterman database searches with inter-sequence SIMD parallelisation.  
609 *BMC Bioinformatics* **12**, 221 (2011).
- 610 56. Katoh, K. & Standley, D. M. MAFFT Multiple Sequence Alignment Software Version 7:  
611 Improvements in Performance and Usability. *Mol. Biol. Evol.* **30**, 772–780 (2013).
- 612 57. Brown, J. W., Walker, J. F. & Smith, S. A. Phyx: phylogenetic tools for unix. *Bioinformatics* **33**, 1886–  
613 1888 (2017).
- 614 58. Price, M. N., Dehal, P. S. & Arkin, A. P. FastTree 2 – Approximately Maximum-Likelihood Trees for  
615 Large Alignments. *PLOS ONE* **5**, e9490 (2010).
- 616 59. Chatzou, M. *et al.* Generalized Bootstrap Supports for Phylogenetic Analyses of Protein Sequences  
617 Incorporating Alignment Uncertainty. *Syst. Biol.* (2018). doi:10.1093/sysbio/syx096
- 618 60. Sievers, F. *et al.* Fast, scalable generation of high-quality protein multiple sequence alignments  
619 using Clustal Omega. *Mol. Syst. Biol.* **7**, 539–539 (2014).
- 620 61. Edgar, R. C. MUSCLE: multiple sequence alignment with high accuracy and high throughput.  
621 *Nucleic Acids Res.* **32**, 1792–1797 (2004).
- 622 62. Blom, N., Gammeltoft, S. & Brunak, S. Sequence and structure-based prediction of eukaryotic  
623 protein phosphorylation sites. *J. Mol. Biol.* **294**, 1351–1362 (1999).
- 624 63. Blom, N., Sicheritz-Pontén, T., Gupta, R., Gammeltoft, S. & Brunak, S. Prediction of post-  
625 translational glycosylation and phosphorylation of proteins from the amino acid sequence.  
626 *Proteomics* **4**, 1633–1649 (2004).
- 627 64. Hunter, J. D. Matplotlib: A 2D Graphics Environment. *Comput. Sci. Eng.* **9**, 90–95 (2007).
- 628



629 **Acknowledgements**

630 We thank Samuel F. Brockington, Nathanael Walker-Hale, and Kali Swichtenberg for critical reading of  
631 the manuscript and very helpful comments.

632

633 **Authors' contributions**

634 HMS and BP designed the experiments, performed bioinformatics analyses, interpreted the results,  
635 and wrote the manuscript. All authors revised the manuscript. We acknowledge support for the Article  
636 Processing Charge by the Open Access Publication Fund of Bielefeld University.

637

638 **Competing interests**

639 The author(s) declare no competing interests.

640

641 **Supplementary material**

642 **Supplementary File 1: PEPD peptide sequences used for multiple sequence alignments.**

643

644 **Supplementary File 2: Length distribution of PEPD orthologues.** PEPD sequence length is displayed on  
645 the x-axis, while the frequency of a sequence length in percentage is shown on the y-axis. Archaea  
646 orthologues are coloured in violet, bacteria in black, fungi in blue, plants in green, and animals in red.

647

648 **Supplementary File 3: Alignment bias control.** The y-axis displays the conservation degree ratio of  
649 each residue across species as well as the variation of this value between alignments (Supplementary  
650 File 4). The x-axis shows the corresponding residue position in the human PEPD amino acid sequence  
651 (UniProt ID: P12955). The green line shows the median of all conservation values observed across all  
652 generated alignments. The red line displays the maximum conservation degree and the blue line the  
653 minimum conservation degree observed for the respective position across all alignments, respectively.

654

655 **Supplementary File 4: Alignment bias control values.** The variation of the calculated conservation  
656 degree based on multiple alignments by MAFFT, ClustalO, and MUSCLE is listed. The first column  
657 contains the position in the reference sequence human PEPD (UniProt ID: P12955). In addition, the  
658 minimal conservation degree observed over 50 alignments, the median of all these conservation  
659 values, and the maximal observed value are provided.

660

661 **Supplementary File 5: Conservation degree of PEPD residues across species.** The conservation degree  
662 of each residue, ranging from 0-1.0 (1.0 being perfect conservation) is listed for animals, plants, fungi,  
663 bacteria, and archaea. The alignment position of each residue is given in the first column, while the  
664 second column refers to the corresponding position in human PEPD (Reference sequence position,  
665 UniProt ID: P12955). The amino acid frequency (AAF) of the most abundant (AAF1) and second  
666 abundant amino acid (AAF2) at a certain position is given for each species. A gap is indicated by “-”.

667

668 **Supplementary File 6: Distance of each residue to the active site of human PEPD.** The distance of  
669 each residue to the active site of human PEPD (PDB ID: 5M4G) is stated in arbitrary units.

670

671 **Supplementary File 7: Previously reported residues for conservation analysis.** All previously reported  
672 residues with relevance to structure and/or function of PEPD are listed with their associated function  
673 and reference. The residue position is derived from human PEPD (UniProt ID: P12955). PTMs identified  
674 in *H. sapiens* or *M. musculus* are marked through Hs and Mm in brackets, respectively.

675

676 **Supplementary File 8: Conserved residues in human PEPD 3D model with structural and/or**  
677 **functional relevance.** The ribbon of the human 3D PEPD model is shown in blue, while residues of  
678 interest are marked in red or alternatively in beige. The metal ions are displayed in violet and water  
679 molecules are shown in cyan. (a) R450 (highlighted in red) is located near the metal binding centre. (b)  
680 T458 and G461 are marked in red and are located in a peripheral loop. (c) G369 and H366 are located  
681 near the metal binding residue H370, where H366 might narrow down the active site. Moreover, P365,  
682 G367, and L368 might be involved in substrate specificity of animal, plant, fungi, and bacteria PEPD.  
683 (d) T299, F298, G296, and P293 stabilize the pita-bread fold by strengthening the loop near the catalytic  
684 site.

685

686 **Supplementary File 9: BUSCO assessment of peptide data set quality.** For each analysed organism  
687 presence (+) or absence (-) of PEPD in their peptide dataset is indicated. Completeness of the data sets  
688 was assessed based on the detection of BUSCO sequences.

689

690 **Supplementary File 10: Discussion of possible limitations.**

691

692 **Supplementary File 11: Identifier of bait sequences.** Donor species and NCBI or UniProt ID of PEPD  
693 bait sequences is listed.

694

695 **Supplementary File 12: Bait sequences.**

696

697 **Supplementary File 13: Approach for residue distance calculation.** Schematic illustration of the  
698 approach used to calculate the distances of all amino acids in PEPD to the active site. Different colours  
699 indicate different amino acids with different degrees of conservation across species.

700
