# 1 **Harnessing natural diversity to identify key residues in Prolidase**

2

3 Hanna Marie Schilbert<sup>1,2\*</sup>, Vanessa Pellegrinelli<sup>1</sup>, Sergio Rodriguez-Cuenca<sup>1</sup>, Antonio  
4 Vidal-Puig<sup>1</sup>, Boas Pucker<sup>3,4,5\*</sup>

5 1 Metabolic Research Laboratories, Wellcome Trust MRC Institute of Metabolic  
6 Science, Addenbrooke's Hospital, University of Cambridge, Cambridge, UK.

7 2 Proteome and Metabolome Research, Center for Biotechnology (CeBiTec), Bielefeld  
8 University, Universitätsstraße 27, Bielefeld, Germany

9 3 Genetics and Genomics of Plants, Faculty of Biology, Bielefeld University, Germany

10 4 Center for Biotechnology (CeBiTec), Bielefeld University, Germany

11 5 Evolution and Diversity, Department of Plant Sciences, University of Cambridge, UK

12

13 \* corresponding authors:

14 HS: [hschilbe@cebitec.uni-bielefeld.de](mailto:hschilbe@cebitec.uni-bielefeld.de)

15 BP: [bpucker@cebitec.uni-bielefeld.de](mailto:bpucker@cebitec.uni-bielefeld.de)

16

17

18 Key words: PEPD, Peptidase D, Xaa-Pro dipeptidase, cancer, natural variation, polymorphism, prolidase  
19 deficiency, conservation, phylogeny

20

21

22

23

## 24 **Abstract**

25 Prolidase (PEPD) catalyses the cleavage of dipeptides with high affinity for proline at the C-terminal  
26 end. This function is required in almost all living organisms and orthologues of PEPD were thus  
27 detected across a broad taxonomic range. In order to detect strongly conserved residues in PEPD, we  
28 analysed PEPD orthologous sequences identified in data sets of animals, plants, fungi, archaea, and  
29 bacteria. Due to conservation over very long evolutionary time, conserved residues are likely to be of  
30 functional relevance. Single amino acid mutations in *PEPD* cause an autosomal disorder called  
31 prolidase deficiency and were associated with various cancer types. We provide new insights into 15  
32 additional residues with putative roles in prolidase deficiency and cancer. Moreover, our results  
33 confirm previous reports identifying five residues involved in the binding of metal cofactors as highly  
34 conserved and enable the classification of several non-synonymous single nucleotide polymorphisms  
35 as likely pathogenic and seven as putative polymorphisms. Moreover, more than 50 conserved  
36 residues across species, which were not previously described, were identified. Conservation degree  
37 per residue across the animal kingdom were mapped to the human PEPD 3D structure revealing the  
38 strongest conservation close to the active site accompanied with a higher functional implication and  
39 pathogenic potential, validating the importance of a characteristic active site fold for prolidase identity.

40

41

42

43

44

45

46

47

48

49

50

51

## 52 **Introduction**

53 Human peptidase D (PEPD) or prolidase (EC 3.4.13.9) is a multifunctional manganese-requiring  
54 homodimeric iminodipeptidase. Its enzymatic activity was reported in 1937 for the first time with the  
55 observation of Glycyl-Proline dipeptides degradation [1]. PEPD belongs to the metalloproteinase M24  
56 family. Its major function is the hydrolysis of peptide bonds of imidodipeptides with a C-terminal  
57 proline or hydroxyproline, thus liberating proline [2].

58 The biological significance of *PEPD* is indicated by the presence in the genomes of most animal species  
59 and its expression in several tissues [3–7]. Moreover, *PEPD* has been identified in fungi [8,9], plants  
60 [10], archaea [11], and even bacteria [12–15]. Especially the presence of PEPD in several mycoplasma  
61 species stresses its essential role in their metabolism and maintaining cellular functions, as these  
62 intracellular parasites display an otherwise extremely reduced gene set [16].

63

## 64 **Physiological role of PEPD**

65 PEPD is the only known metalloenzyme in eukaryotes catalysing the hydrolysis of X-P [17]. Therefore,  
66 deleterious mutations in *PEPD* in human lead to a rare autosomal disease called prolidase deficiency  
67 (PD), which is characterized by skin ulcerations -due to defective wound healing-, immunodeficiency,  
68 mental retardation, splenomegaly, recurrent respiratory infections and imidodipeptiduria [18–20]. To  
69 date, 29 different pathogenic variants have been reported and associated with PD, resulting in a partial  
70 or complete enzyme inactivation [21]. In addition to this autosomal disease, perturbations in PEPD  
71 expression, (serum) activity or serum levels have been associated with several (patho)physiological  
72 processes, including remodelling of the extracellular matrix, inflammation, carcinogenesis,  
73 angiogenesis, cell migration, and cell differentiation [22–27]. Moreover, alterations of PEPD serum  
74 activity are associated with a spectrum of mental diseases, like post-traumatic stress disorder [28] and  
75 depression [29].

76 In bacteria and archaea, PEPD is assumed to be involved in the degradation of intracellular proteins  
77 and proline recycling [30]. In animals, PEPD is involved in the degradation proline-rich dietary proteins  
78 and seems to play an important role in proline recycling [2]. Since collagen (a major components of  
79 extracellular matrix) consists of 25% proline and hydroxyproline, PEPD is thought to be the rate limiting  
80 step in collagen turnover [2,31]. Interestingly, there is a growing body of evidence showing that PEPD  
81 may also have additional pleiotropic effects, independently from its enzymatic activity. Thus, PEPD has

82 been reported to influence the p53 pathway by direct protein-protein interaction [32] and acts as  
83 ligand for EGFR and ErbB2 when released by injured cells [33,34].

84

### 85 **Characterization of the enzymatic and structural properties of PEPD**

86 The crystal structure of PEPD has been extensively investigated in several species, including bacteria  
87 [16,35], archaea [36], and eukaryotes [17]. PEPD belongs together with methionine aminopeptidase  
88 (MetAP; EC 3.4.11.18) and aminopeptidase P (APP; EC 3.4.11.9) to the “pita-bread” family, which is  
89 able to hydrolyse amido-, imido-, and amidino-containing bonds [37,38]. Characteristic for this family  
90 is the highly conserved characteristic pita-bread fold in the catalytic C-terminal domain including the  
91 metal centre and a well-defined substrate binding pocket [37,39]. The catalytic C-terminal domain  
92 comprises five highly conserved residues for the binding of the metal cofactors: D276, D287, H370,  
93 E412, and E452 (positions refer to human sequence) [17].

94 The preferable substrate, optimal pH and temperature, and required metal ions (e.g.  $Mn^{2+}$ ,  $Zn^{2+}$  or  
95  $Co^{2+}$ ) are species-dependent [2]. Although PEPD appears to be a (homo)dimer in most species including  
96 humans, it can be also active as a monomer or even as a tetramer in certain species [2]. The  
97 homodimeric human PEPD preferably hydrolyses G-P, is adapted to a pH value of 7.8 with a  
98 temperature optimum of 50°C, and shows long-term activity at 37°C [17,40]. *In vitro* studies based on  
99 recombinant PEPD produced in CHO cell lines and *E. coli* as well as endogenous PEPD of human  
100 fibroblasts, revealed G-P as preferred substrate followed by a lower substrate specificity for A-P, M-P,  
101 F-P, V-P, and L-P dipeptides [40]. Moreover, in human PEPD the substrate specificity for dipeptides is  
102 determined through the presence of specific residues, like R398 and T241, which prevent the binding  
103 of longer substrates [17].

104

### 105 **Regulation of PEPD**

106 PEPD is a phosphotyrosine and phosphothreonine/serine enzyme [41,42]. Phosphorylation results in  
107 an increase of PEPD activity and is mediated by the MAPK pathway and NO/cGMP signalling for  
108 tyrosine and threonine/serine residues, respectively [41,42]. Phosphorylation mediated up-regulation  
109 of PEPD activity was reported without an increased gene expression, indicating the importance of  
110 post-translational modification in its regulation [41,42]. *In silico* analysis of human PEPD indicated  
111 post-translational modifications like glycosylations. N-glycosylation was predicted for N13 and N172,  
112 while O-glycosylation was thought to effect T458 [22].

113 We anticipate the detailed profiling of conserved residues in PEPD during evolution may help to  
114 identify and understand essential components for mentioned PEPD functions and structure. This  
115 increased knowledge could help explain the role of PEPD in diseases, especially prolidase deficiency.  
116 Taxon-specific conservation of residues provides additional insights e.g. into post-translational  
117 modification in eukaryotes. This study identified orthologous sequences of PEPD in peptide sequence  
118 sets of several hundred organisms including bacteria, archaea, animal, fungi, and plant species to  
119 investigate the conservation of residues in PEPD across the tree of life. We further identified highly  
120 conserved residues, which are likely to play key functional roles.

121

## 122 **Results and Discussion**

### 123 **Sequence lengths differentiate between high-level taxonomic groups**

124 In total, 769 putative PEPD orthologues were identified in animals (440), plants (122), fungi (72),  
125 archaea (42), and bacteria (93) (Supplementary File 1). PEPD orthologues in animals revealed an  
126 average sequence length of 493 amino acids (aa), while plants and fungi orthologues had an average  
127 sequence length of 499 aa and 507 aa, respectively (Supplementary File 2). Compared to these three  
128 kingdoms, PEPD sequences of bacteria were slightly smaller with an average sequence length of 455  
129 aa. However, PEPD orthologues identified in archaea showed the smallest average sequence length of  
130 a kingdom with 360 aa. These findings matched previous reports of 349 aa (*P. furiosus*) and 493 aa  
131 (*H. sapiens*) [11,17]. In general, our observations indicate that PEPD sequence length has changed  
132 during evolution. This length difference could be due to an increase of complexity and functionality of  
133 PEPD in eukaryotes, where it is known as a multifunctional enzyme [2], or due to a loss of domains in  
134 prokaryotes. Observing longer version in eukaryotes is not surprising, because eukaryotes are probably  
135 more likely to tolerate larger proteins than bacteria due to differences in the relative metabolic burden  
136 [43].

137

### 138 **Analysis of previously described residues**

139 Our broad taxonomic sampling captured vast natural diversity, which was harnessed to identify highly  
140 conserved residues. From conservation of amino acid residues over billions of years during evolution,  
141 we infer functional relevance. A huge diversity of different species and thus sequences is key to  
142 distinguish relevant residues from the phylogenetic background. To ensure an accurate alignment of  
143 all analysed sequences, the alignment was performed with permutations of the input sequences and

144 repeated with different alignment tools. The average difference per position in the resulting  
145 alignments is low (Supplementary File 3 and 4).

146

#### 147 **Conservation of functional and structural relevant residues**

148 Highly conserved residues are likely to have a high functional, and/or structural relevance. Aiming to  
149 extend the knowledge about the already existing crystallization models of especially human PEPD, we  
150 analysed the conservation degree of known residues relevant for the structure and function of PEPD  
151 [17]. Despite the high diversity of metal ions accepted by different species [2], the amino acids  
152 responsible for the binding of the metal ions (D276, D287, H370, E412, and E452) are highly conserved  
153 across species (Supplementary File 5). All residues reported for the interaction with metal ions were  
154 detected in over 90% of all sequences. Sequences without these particular residues are likely to be  
155 partial and thus not covering this position leading to a lower observed conservation value. When  
156 excluding sequence gaps, almost 100% match is reached for all five positions. Based on these results,  
157 we conclude that all selected sequences are *bona fide* prolidases. This finding marks the conservation  
158 of these five residues as one important structural and functional characteristic of PEPD (Figure 1).

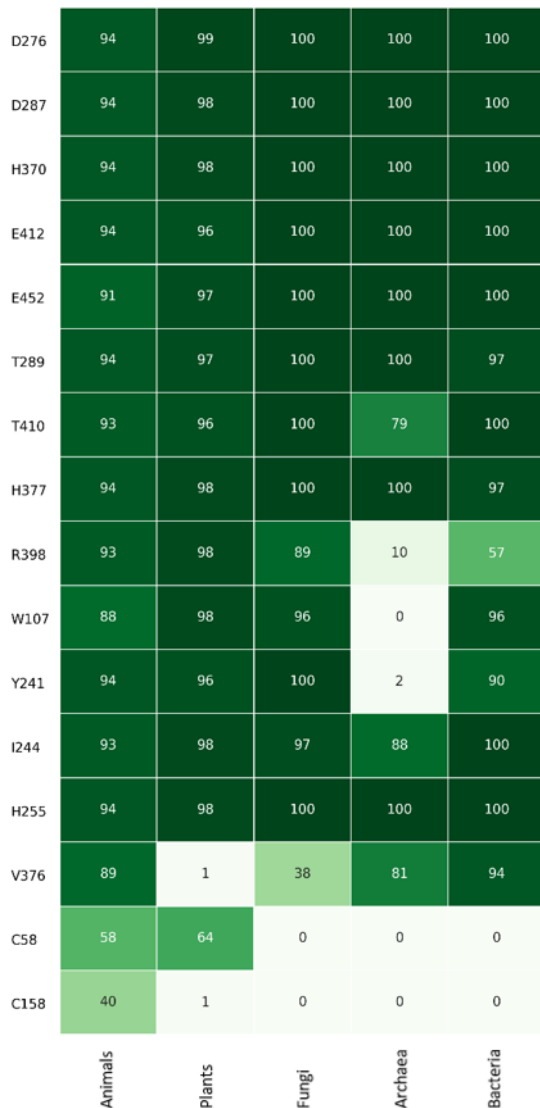

159

160 **Figure 1: Heatmap of reported functionally important residues of PEPD.** The conservation degree of reported  
 161 residues important for PEPD functionality and structure is displayed in percentage across species. Each column  
 162 represents a kingdom, while the rows display the analysed residue and its corresponding position in the human  
 163 PEPD amino acid sequence. A dark green background indicates high conservation, while white means no  
 164 conservation.

165 Additionally, strong conservation of T289 and T410 in proximity to the manganese ions supports  
 166 previous reports and hypotheses of their functional relevance in PEPD [22].

167 Nevertheless, one plant- and three animal PEPD orthologues showed an amino acid substitution of one  
 168 metal binding residue: *Ancylostoma ceylanicum* (H370V), *Arachis duranensis* (D287N), *Oncorhynchus*  
 169 *kisutch* (E452K) and *Tetraodon nigroviridis* (E452R). Crystal structures and enzyme assays could  
 170 illuminate the consequences of these substitutions thus providing natural sequences to assess the  
 171 contribution of each residue. Since D287N was reported before as a probably deleterious substitution  
 172 [44], these prolidases may have lost their ability to cleave X-P dipeptides.

173 Another essential step for the enzymatic catalysis of prolidases is the binding of their dipeptide  
174 substrate (e.g. G-P)[17]. For example, H255 binds to the carboxylate group of the C-terminal proline  
175 residue of the substrate and its side chain moves upon substrate binding by about 6 Å<sup>o</sup> narrowing down  
176 the size of the active site [17]. The importance of such substrate binding residues, like H255 and H377  
177 [17], was validated through a high conservation degree of minimum 94% in all living organisms (Figure  
178 1). Interestingly, another residue involved in G-P binding in human PEPD, R398 [17], is highly conserved  
179 except in archaea (Figure 1). Besides its role in G-P binding, this residue is also important for the  
180 specificity of PEPD for dipeptides by determining the length of the ligand at the C-terminus through its  
181 large side chain [16,17]. These results suggest that the majority of analysed archaeal prolidases might  
182 not be capable of G-P degradation and may have a broader substrate spectrum due to the missing  
183 R398. In line with the hypotheses, Ghosh *et al.* showed that PEPD purified from the archaeon  
184 *P. furiosus* revealed no substrate specificity for G-P, but for longer substrates like K-W-A-P and  
185 P-P-G-F-S-P, although this specificity was rather weak [11]. However, the preferred substrates of this  
186 enzyme were the dipeptides M-P and L-P [11]. Interestingly, *P. furiosus* still has a corresponding  
187 arginine residue at the position 295 [16]. This R295 was reported to have dual functionality for cleaving  
188 di- and tripeptides due to the intermediate position of this arginine [16]. These reports support the  
189 hypothesis that archaeal prolidases have a broader substrate spectrum compared to the prolidases of  
190 the other kingdoms. In turn, the strong conservation of R398 in eukaryotes may indicate an adaptation  
191 to the specific recognition of dipeptides. In line with the hypothesis, the bulky side chain of R398  
192 was reported to prevent the acceptance of tripeptides [17]. Moreover, a strong conservation of W107,  
193 except in archaea, was identified (Figure 1). After G-P binding, W107 is shifted inwards to the active  
194 site, sealing the active site [17]. The low conservation of W107 in archaea suggests that archaeal  
195 prolidases might use a different conformational change, probably due to their putative expanded  
196 substrate spectrum.

197  
198 Furthermore, some residues were reported to be involved in the interaction of L-P, another potential  
199 prolidase substrate: Y241, I244, H255, and V376 [17]. H255 and I244 are highly conserved across  
200 species (Figure 1). V376 is less conserved in fungi and not conserved in plants. Y241 is not conserved  
201 in archaea. Since *P. furiosus* PEPD is capable of binding and degrading L-P, Y241 is probably not  
202 essential for this binding process in archaea. Another reason for the flexibility in archaea might be the  
203 putatively expanded substrate spectrum due to the absence of Y241, which is reported to close the  
204 active site on the side where the N-terminus of the substrate is placed [21]. To the best of our  
205 knowledge, the effect of the absence of V376 in plants was not investigated yet.



206 In order to identify a common disulfide bond responsible for the common dimer formation of  
207 prolidases previously reported cysteine residues [17] were analysed. In human PEPD an intramolecular  
208 disulfide bridge was observed between C58 from chain A and C158 from chain B [17]. However, this  
209 bond was only present in the inactive ( $Mn^{2+}$  free) enzyme complex, while the substrate was bound in  
210 the active site [17]. These amino acids are weakly conserved in the animal kingdom (58% and 40%  
211 respectively), but showed an almost complete conservation among vertebrata likely due to their  
212 relevance in the dimer formation in this group. However, these cysteines might not be responsible for  
213 the dimer formation in the active form of the enzyme, which occurs in most of the prolidases [8,17,45].  
214 Therefore, we aimed to identify a better candidate for this common PEPD conformation. However, we  
215 could not identify a highly conserved cysteine across species, suggesting (I) the presence of different  
216 interactions for stabilization of e.g. PEPD dimers or (II) frequent occurrence of PEPD as a monomer.  
217

### 218 Analysis of residues known to be mutated in prolidase deficiency

219 The majority of amino acids that are hot spots causing PD (6/11: D276, G278, L368, E412, G448, G452)  
220 are localised near or in the active side of PEPD [22,46]. These amino acids are conserved across species,  
221 thus suggesting a negative correlation between the distance of a residue to the active site and its  
222 conservation in animals. As expected, highly conserved (>85%) residues are more likely to be located  
223 close to the active site ( $p$ -value= 3.76e-06, Mann-Whitney U test)(Figure 2, Supplementary File 6).

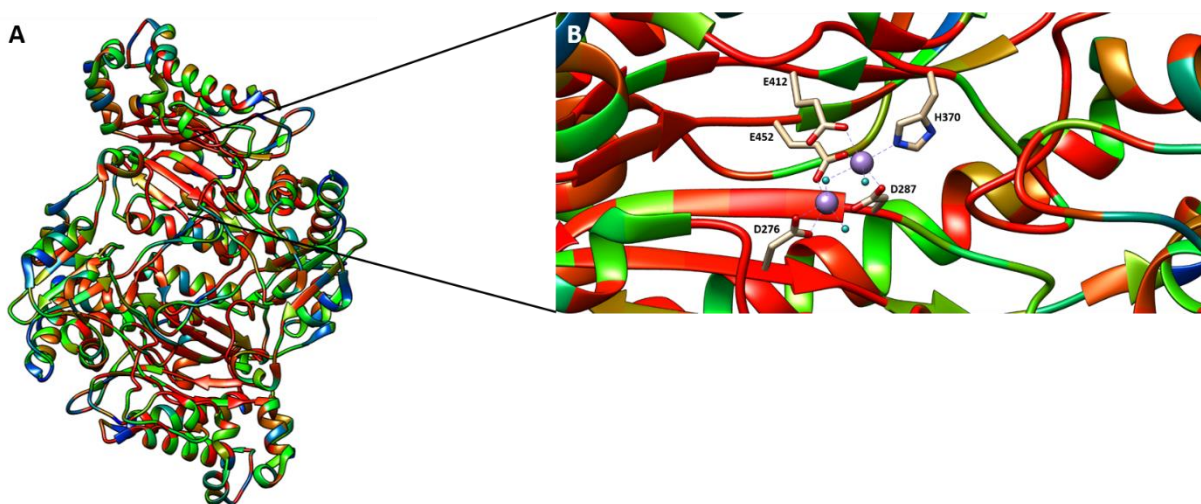

224

225 **Figure 2: The catalytic cavity is highly conserved in the animal kingdom.** (A) Three dimensional heat map of  
226 residue conservation degree in the animal kingdom, displayed represented by the PEPD structure of human  
227 prolidase (5M4G). The colour scale ranges from red (highly conserved residues) over orange and green to blue  
228 (weakly conserved residues). (B) Conservation degree of the catalytic site of human PEPD. The metal binding  
229 residues (D276, D287, H370, E412, and E452) are shown together with the bound  $Mn^{2+}$  ions (violet) and water  
230 molecules (cyan).

231 As mentioned previously the metal binding residue E452 is highly conserved across species and its  
232 deletion results surprisingly in a preservation of the active site [21], likely because it can be replaced  
233 by neighbouring residues. However, the mutated protein shows less than 5% of the WT activity [47]  
234 supporting our findings. Additionally, our results are in line with findings of Bhatnager and Dang, 2018,  
235 who identified the mutation of D276N, G278D, E412K, and G448R as damaging substitutions [44],  
236 because we observed a strong conservation of all four residues. Recently the structural basis of these  
237 and other PD mutations have been analysed in detail [21]. Once again in accordance with our results,  
238 Wilk *et al.* claimed that the D276N mutation results in an excessive reduction of the PEPD activity due  
239 to the loss of one of the catalytic metal ions derived from the charge change caused by the substitution  
240 [21]. Similarly, in the G278D mutant the loss of one metal ion and additional enhanced disorder were  
241 observed [21]. Interestingly, the previously as highly conserved identified Y241 seems to have high  
242 functional relevance since its displacement in this mutant results in a destabilization of two metal  
243 binding residues (D276 and D287)[21]. In addition, the highly conserved substrate coordinating residue  
244 H255 is completely absent from the active site of the G278D mutant [21] stressing its importance in  
245 maintaining PEPD functionality. H255 is also absent in the G448R mutant contributing to a  
246 dysfunctional protein core [21]. The substitution of the metal binding E412 to K results once again in  
247 the loss of one metal ion by an amino acid side chain leading to PEPD inactivation [21].

248 R184 is defined by the shortest atom-to-atom distance to G-P in human PEPD and marks the end of  
249 the N-terminal chain of human PEPD [21]. The deletion or mutation of R184 to G in PD patients results  
250 in an inactive PEPD or one with highly reduced enzyme activity, respectively [21]. Therefore, R184  
251 might be essential for the functionality and structure of PEPD, which is supported by its high  
252 conservation across many species [22]. In this study, this finding was validated with a minimum  
253 conservation degree of 92% of all sequences analysed. Moreover, D375 and D378 were identified as  
254 highly conserved across species. Interestingly, these residues were both recently reported to directly  
255 interact with R184 [21]. In the PD mutation variant R184G, the interaction between R184 with D375  
256 and D378 is lost, due to the replacement of the positive charged guanidinium group of R184 to the  
257 neutral amide group of G [21]. The resulting protein shows only residual activity, supporting the  
258 hypothesis that D375 and D378 are highly important for PEPD functionality.

259 Additional relevant residues in PD are not particular conserved across different phyla. Among them  
260 are S202 (90%) and Y231 (89%) highly conserved in animals. While the deletion of Y231 results in  
261 alterations in the dimer interface with remaining PEPD activity, the S202F substitution increases PEPD  
262 disorder resulting in the inability to hydrolyse G-P [21]. Y241 is affected by S202F contributing to loss  
263 of PEPD activity, since Y becomes disordered even though all other metal binding residue are not

264 affected [21]. Since Y241 interacts in the WT human PEPD structure with the metal binding aspartates  
 265 [21], its disorder might result in the loss of this interaction, thus destabilizing PEPD. However, A212  
 266 (45%) and R265 (35%) show a substantially smaller conservation degree compared to S202 and Y231.  
 267 Strong conservation of A212 and R265 is limited to vertebrates thus suggesting a pathogenic role  
 268 limited to this branch. The phenotype of S202P, A212P, and L368R are not distinguishable from each  
 269 other, posing an example for relevant residues in PD without strong conservation [46].

270

## 271 Identification of polymorphisms in damage-associated SNPs in human prolidase gene

272 Recently, Bhatnager and Dang (2018), identified damage associated single-nucleotide polymorphisms  
 273 (SNPs) in human prolidase gene based on a comprehensive *in silico* analysis [44]. We observed that  
 274 some of their non-synonymous SNPs are leading to substitutions at variable positions thus qualifying  
 275 as polymorphisms instead of pathogenic variants. Such a SNP is causing the substitution of V to I at  
 276 position 305, while our analysis revealed V in 78% and I in 16% of all animal PEPD sequences. Six out  
 277 of seven tools predicted this SNP as neutral, supporting our assumption [44]. Similar ratios and even  
 278 dominance of a different amino acid were observed for I45V, E227L, and L435F indicating three  
 279 additional polymorphisms. Additionally, we hypothesize that nsSNPs leading to T137M, V456M, and  
 280 D125N are likely to be polymorphisms as the conservation of the canonical amino acid is low.

281 However, the remaining nsSNPs showing a higher conservation degree in the animal kingdom indicate  
 282 that they may be important for structure or function of PEPD in the animal kingdom and that  
 283 substitutions of these residues have a pathogenic potential [44]. This is especially the case for the  
 284 overlaps of the identified consensus nsSNPs, which were predicted from all tools as damage  
 285 associated, with our results stressing that these residues are highly conserved not only in the animal  
 286 kingdom, but also across species [44](Table 1).

287 **Table 1: Conservation degree across species for positions, which were reported to be derived from damage-**  
 288 **associated nsSNPs.** The conservation degree of positions, which were reported to be derived from  
 289 damage-associated nsSNPs are stated for animals (An), plants (Pl), fungi (Fu), bacteria (Ba) and archaea (Ar). The  
 290 first column contains the position of each amino acid based on the human PEPD sequence (Reference sequence  
 291 position, RSP; UniProt ID: P12955). The amino acid frequency (AAF) ranging from 0 to 1 (1=100% conserved) of  
 292 the most abundant (1) and second abundant (2) amino acid at a certain position is listed. Gaps in the alignment  
 293 are indicated through a "-" followed by the conservation degree in the kingdom. Only a "-" is given, when the  
 294 first amino acid is 100% conserved.

| RSP | An AAF1 | An AAF2 | Pl AAF1 | Pl AAF2 | Fu AAF1 | Fu AAF2 | Ba AAF1 | Ba AAF2 | Ar AAF1 | Ar AAF2 |
|-----|---------|---------|---------|---------|---------|---------|---------|---------|---------|---------|
| 19  | P_0.71  | S_0.18  | P_0.73  | -_0.1   | P_0.97  | D_0.01  | -_0.62  | P_0.26  | -_1.0   | -       |
| 35  | R_0.51  | K_0.24  | R_0.76  | -_0.06  | L_0.31  | R_0.17  | P_0.37  | A_0.22  | E_0.25  | Y_0.1   |

|     |        |        |        |        |        |        |        |        |        |        |
|-----|--------|--------|--------|--------|--------|--------|--------|--------|--------|--------|
| 188 | T_0.73 | S_0.2  | S_0.89 | T_0.08 | D_0.82 | T_0.1  | D_0.5  | T_0.43 | D_0.63 | E_0.13 |
| 192 | L_0.67 | I_0.25 | L_0.8  | I_0.14 | I_0.64 | V_0.19 | I_0.38 | L_0.34 | I_0.5  | L_0.38 |
| 224 | S_0.81 | A_0.11 | S_0.95 | A_0.02 | A_0.92 | G_0.06 | G_0.28 | L_0.25 | A_0.43 | G_0.2  |
| 240 | S_0.84 | A_0.08 | S_0.90 | _0.02  | A_0.38 | G_0.35 | P_0.44 | G_0.4  | S_0.48 | A_0.48 |
| 247 | S_0.79 | T_0.13 | T_0.89 | S_0.07 | S_0.74 | A_0.21 | L_0.41 | S_0.24 | S_0.45 | F_0.38 |
| 255 | H_0.94 | _0.05  | H_0.98 | _0.02  | H_1.0  | -      | H_1.0  | -      | H_1.0  | -      |
| 276 | D_0.94 | _0.05  | D_0.99 | _0.01  | D_1.0  | -      | D_1.0  | -      | D_1.0  | -      |
| 278 | G_0.94 | _0.06  | G_0.99 | _0.01  | G_0.97 | A_0.03 | G_0.99 | T_0.01 | G_0.95 | T_0.05 |
| 287 | D_0.94 | _0.05  | D_0.98 | _0.02  | D_1.0  | -      | D_1.0  | -      | D_1.0  | -      |
| 296 | G_0.94 | _0.05  | G_0.98 | _0.02  | G_0.97 | T_0.01 | G_0.62 | S_0.19 | G_0.45 | _0.18  |
| 373 | G_0.94 | _0.06  | G_0.98 | _0.02  | G_1.0  | -      | G_1.0  | -      | G_1.0  | -      |
| 378 | D_0.93 | _0.05  | D_0.98 | _0.02  | D_1.0  | -      | D_0.94 | E_0.06 | E_0.85 | D_0.15 |
| 403 | L_0.80 | V_0.12 | L_0.96 | _0.02  | L_0.94 | V_0.04 | L_0.78 | I_0.15 | L_0.85 | I_0.13 |
| 410 | T_0.93 | _0.06  | T_0.96 | _0.02  | T_1.0  | -      | T_1.0  | -      | T_0.78 | S_0.23 |
| 412 | E_0.94 | _0.06  | E_0.96 | _0.02  | E_1.0  | -      | E_1.0  | -      | E_1.0  | -      |
| 447 | G_0.93 | _0.07  | G_0.97 | _0.03  | G_1.0  | -      | G_0.53 | _0.4   | F_0.6  | G_0.25 |
| 448 | G_0.93 | _0.06  | G_0.97 | _0.03  | G_1.0  | -      | G_1.0  | -      | G_1.0  | -      |

295

## 296 **PEPD in cancer**

297 Altered PEPD activity and serum level have been frequently described in different cancer types  
 298 suggesting an involvement of PEPD in cancer [2,23,24,48]. The investigation of curated SNPs in *PEPD*,  
 299 which are associated with specific cancer types (BioMuta database [49]), revealed missense mutations  
 300 in various cancer types to be distributed across the whole PEPD sequence (Supplementary File 7). As  
 301 many SNPs were associated with a low frequency, we focused on a small set of more frequent ones.  
 302 Surprisingly, the amino acid affected by the most frequent SNPs in various cancer types is A74, a  
 303 residue located in the non-catalytic N-terminal domain. While the general frequency in animals is low  
 304 (38%), it displays a strong conservation in mammals thus suggesting a functional role. Other frequently  
 305 effected residues are A122, H155, G257, R311, M329, and D378. All of them are conserved to different  
 306 extents in the animal kingdom, while three (G257, M329, and D378) are also conserved in plants.  
 307 However, D378 is the only amino acid conserved across all species. Being in proximity to the metal  
 308 binding residue H370, the high conservation degree of D378 might be due to its role in forming a  
 309 functional catalytic site. However, we could not identify a “cancer specific hot spot residue” in the  
 310 animal kingdom and thus the appearance of SNPs in *PEPD* in various cancer types is likely not to be the  
 311 driving force of a specific cancer type and the identified SNPs might be polymorphisms.

312

### 313 **Post-translational regulation of PEPD**

314 Since there is experimental evidence of PEPD activity being regulated at the post-translational level  
315 through phosphorylation [41,42], we aimed to validate previously predicted post-translational  
316 modifications (PTMs) [50] in human PEPD. None of the examined sites were highly conserved across  
317 species (Supplementary File 5), which could be explained by differences in the PTM mechanisms  
318 between prokaryotes and eukaryotes [51,52]. Nevertheless, some residues were conserved in the  
319 animal kingdom e.g. R196 (88%). The low conservation values could be due to differences in PTMs  
320 between different groups of eukaryotes [51]. The lack of conservation for some of these residues (S8,  
321 K36, S113, T487, A490, K493) could be explained in three ways: (I) no strong functional relevance for  
322 PEPD, (II) false positive prediction, or (III) a human specific regulation system. *Vice versa*, three residues  
323 are highly conserved at least in the animal kingdom (T15:80%, Y128:78%, R196:88%) posing good  
324 candidates for a PTM site. Two of the three amino acids are predicted to be phosphorylated (T15 and  
325 Y128), while R196 is thought to be monomethylated [50].

326 Lupi *et al.* predicted putative PTMs at N13, N172 (NetNGly), and T458 (NetOGlyc) [22]. These residues  
327 were found to be highly conserved among vertebrates. This situation could be explained by a more  
328 recently evolved function or a relaxed ancestral function in species without strong conservation. *In*  
329 *silico* prediction of new phosphorylation sites resulted in T90, S113, Y121, Y128, S202, S224, S138,  
330 S240, S247 and S460 as best candidates. Conservation degrees generally support these predictions  
331 (Supplementary File 5) and distribution across species suggests a more recently increased relevance of  
332 S113 and S138.

333

### 334 **Identification of novel conserved residues**

335 All structure related observation and hypothesis are based on human prolidase crystallization structure  
336 (PDB: 5M4G). As we already validated through the correlation in the animal kingdom, highly conserved  
337 residues are located nearby or in the substrate binding site. Therefore, it was not surprising that  
338 residues near the metal binding residue E452 are highly conserved across species especially R450:92%  
339 along with the previously reported G448:93%. The side chain of R450 is near the metal binding site,  
340 indicating that it might be essential for the formation of a functional metal ion binding site  
341 (Supplementary File 8 (A)). Another two conserved residues, T458 and G461, are located in the curve  
342 of a C-terminal loop near the binding site (Supplementary File 8 (B)). The small size of these amino

343 acids might be necessary to form this structural feature. However, T458 could be a putative  
344 phosphorylation site. Since it is located on the outer surface of the enzyme, it is accessible for  
345 modifications. Additionally, we observed a cluster of highly conserved residues (G406-V408), which  
346 are part of the pita-bread structure, stressing the importance of this fold for the function of PEPD as  
347 metalloproteinase.

348 Again, highly conserved residues across species were identified near another known metal binding  
349 residue E412: Y416:94%, P413:94%, and G414:93% are located near the active site and are therefore  
350 good candidates for generating a functional binding site. The glycine and proline seem to be important  
351 to allow the proper arrangement of the metal binding residues by providing space between them. The  
352 side chain of Y416 is pointing into the active side, indicating it might have an additional functional role  
353 (Figure 3 (A)).

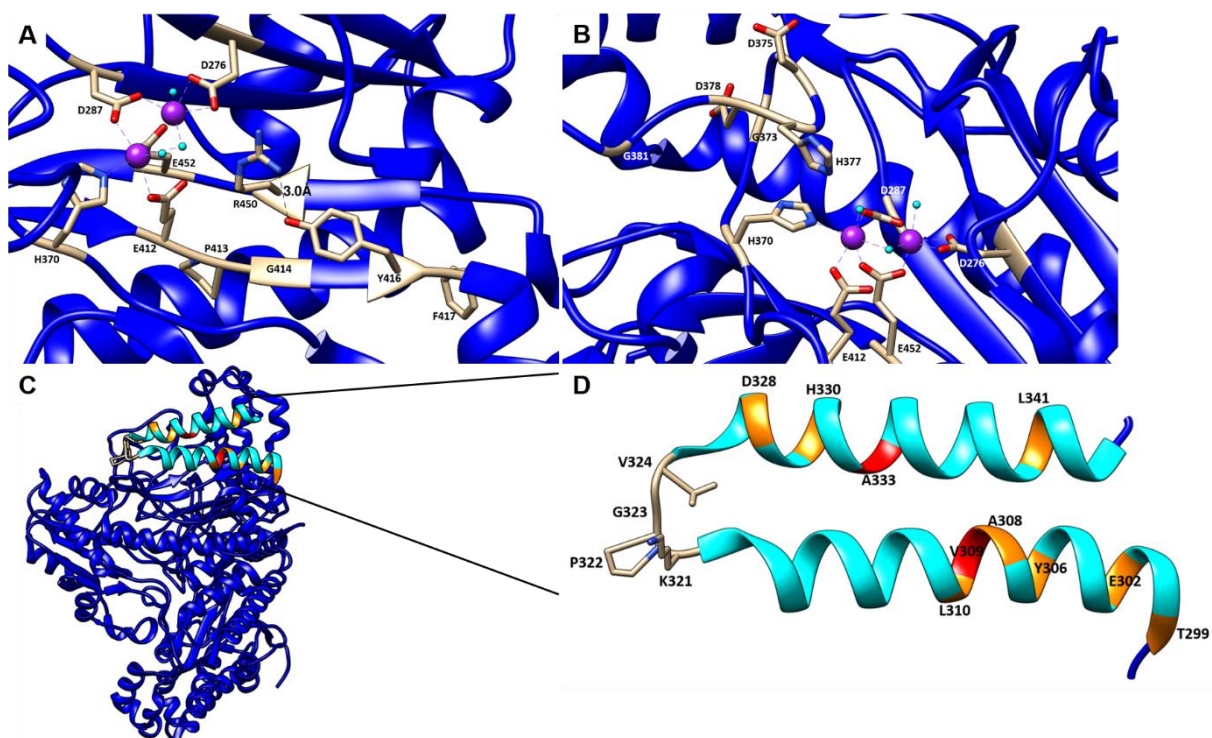

354

355 **Figure 3: Novel highly conserved residues with functional and/or structural importance in PEPD.** The ribbon of  
356 the human PEPD 3D model is shown in blue, while residues of interest are lettered. The metal ions are shown in  
357 violet and water molecules are shown in cyan. (A) Highly conserved residues P413, G414, and Y416 are located  
358 near the metal binding residue E412 and are likely to be involved in generating a functional binding cavity. Y416  
359 might stabilize the anti-parallel  $\beta$ -strand through interaction with R450. (B) G373, D375, D378, and G381 are  
360 involved in the stabilization of the loop, which results in an optimal position of the substrate-binding residue  
361 H377. (C) Peripheral localisation of the helix with highly conserved residues. (D) The peripheral helix contains  
362 two highly conserved residues (A333 and V309), which are marked in red and other conserved residues, which  
363 are marked in orange. Moreover, residues building the loop (V324, G323, P322, and K321) are conserved, too.

364 However, it is more likely that it has a stabilizing effect building a hydrogen bond with the NH group of  
365 R450:92% (Figure 3 (A)) thus stabilizing the anti-parallel  $\beta$ -strand. This anti-parallel  $\beta$ -strand seems to  
366 be highly important for PEPD functionality, since substitutions in the parallel  $\beta$ -strand e.g. G447R or  
367 G448R were reported to null PEPD activity [44]. The insertion of a bulky arginine side chain, which  
368 prevents the correct assembly of the  $\beta$ -sheet, could be the explanation [44]. Furthermore, F417:82%  
369 is highly conserved in every kingdom except archaea, expanding the number of conserved residues in  
370 this conserved region (Figure 3 (A)).

371 The conserved G373 is located in a tied turn of the peptide chain, suggesting its interplay with the  
372 conserved residues D375, D378, and G381 to form a loop. As a result, the important dipeptide-binding  
373 residue H377 is placed near the catalytic site (Figure 3 (B)). Weak conservation of these residues in  
374 archaea vindicates the previously mentioned hypothesis that archaea PEPD might be able to hydrolyze  
375 a broader substrate spectrum. Additionally, we identified the two conserved residues G369 and H366  
376 near the metal binding residue H370 (Supplementary File 8 (C)). The side chain of H366 is pointing into  
377 the active site, indicating that it will narrow down the active site, therefore contributing to substrate  
378 specificity. Interestingly, residues near H366 e.g. P365, G367, and L368 are highly conserved with  
379 exception of the archaea kingdom. This could explain the ability of archaeal prolidases to process  
380 tripeptides in addition to dipeptides.

381 The highly conserved residues T299, E302, Y306, A308, V309, L310, K321, P322, G323, V324, D328,  
382 H330, and L341 form two parallel helices located in the periphery of PEPD, thus exposed to the solvent  
383 (Figure 3 (C)). Based on their extremely high conservation, V309 and A333 are probably most important  
384 for this structure (Figure 3 (D)). Whether this region could be the cause for some of extracellular  
385 functions of PEPD, e.g. EGFR or ErbB2 binding [33,34] or might be a target for a regulatory protein,  
386 needs to be investigated in the future.

387 Moreover, T299, F298, G296 and P293 are highly conserved across species except archaea. These  
388 residues might stabilize the pita-bread fold by strengthening a loop near the catalytic site  
389 (Supplementary File 8 (D)).

390 Interestingly, Y284 is highly conserved across species, especially in the archaea, bacteria, fungi, and  
391 plant kingdom with a minimal conservation of 93%. The conservation degree in animals is only 68%,  
392 but the human prolidase contains a F at this position. Across all animals, the conservation of F at this  
393 position is 25% ranking it second to Y. Most mammal sequences displayed F at this position, thus  
394 indicating (I) a specific function of F in this group or (II) a polymorphism at a permissive site.

395 Additionally, near the metal binding residue D276, some amino acids display strong conservation  
396 including G278, G270, E280, and L274.

397 Interestingly, investigation of residues near the highly conserved H255 revealed an exclusive  
398 conservation of the region between L257 and A259 in animals and plants. It is located in a loop  
399 structure at the periphery of PEPD. This region and other similar observations e.g. G385, V386, M236,  
400 G149, N151, T152, Q49, and G50 indicating that plant and animal prolidases might have distinct  
401 structural features compared to archaea, bacteria, and fungi. However, the flanking amino acids of  
402 H255 are highly conserved at a minimum of 94% in animals, plants and fungi, stressing its importance  
403 in eukaryotes.

404 The highly conserved K187:93% separates two helices from each other in human prolidase and might  
405 therefore be of structural relevance.

406 Another highly conserved residue is E219:90%, which is likely to stabilize a  $\beta$ -strand from the pita-bread  
407 fold, possibly through the interaction with the side chain of another conserved residue N250 or S247  
408 (Supplementary File 8 (E)). Moreover, R401 is highly conserved in animal and plant sequences facing  
409 the side chain of another conserved residue in the N-terminal region: E182 (Supplementary File 8 (F)).  
410 The atom distance between both side chain atoms matches the range of hydrogen bonds with  $\sim 2.7$  Å  
411 to  $\sim 3$  Å [53]. Thus, both residues could be involved in stabilizing the structure of PEPD.

412 Overall, we observe more conserved residues in the C-terminal catalytic region compared to the N-  
413 terminal region. Nevertheless, P98, L95, P80, G76, and F65 are examples for conserved residues in the  
414 N-terminal part. Their functions are yet to be determined.

415

## 416 **Limitations and perspectives**

417 Numerous PEPD orthologues were identified across all living organisms to pinpoint key residues in this  
418 protein. The selection of sequences from different groups is not balanced and we do not attempt to  
419 assign evolution events to certain groups, which would be possible based on an even more  
420 comprehensive sample. A high natural diversity allowed us to distinguish between variable positions  
421 with low if any functional relevance and highly conserved residues, which are likely to play key  
422 catalytic, structural, or regulatory roles in PEPD. The results match previously reported residues and  
423 enabled us to identify additional residues, which should be subjected to in-depth investigation and will  
424 eventually shed light on function and structure of PEPD. However, 264 (27%) of the screened data sets  
425 did not reveal a PEPD candidate based on our bait sequences. A majority of species without PEPD



426 candidates (175) were bacteria (Supplementary File 9). Since PEPD is a relevant enzyme at least in  
427 eukaryotes, it is unlikely to be missing in many species. Technical limitations like incomplete assemblies  
428 or annotations could be the reasons for the absence of PEPD from some data sets. Therefore, we  
429 checked the completeness of all analysed data sets through the identification of suitable benchmarking  
430 genes that are assumed to be present in the respective species (Supplementary File 9) and discussed  
431 it in detail (Supplementary File 10). The identification of additional PEPD orthologues would facilitate  
432 further analyses e.g. improve the differentiation between pathogenic substitutions and harmless  
433 polymorphisms. We used our observations to predict the functional impact of nsSNPs and expect that  
434 this approach will be useful in the future for similar applications. We anticipate that the use of *in silico*  
435 tools integrating evolutionary genetics and structural data available will help to gain knowledge e.g.  
436 regarding the molecular characterization of PEPD, the identification of new regulatory residues, the  
437 extracellular role of PEPD, and new therapeutic strategies against prolidase deficiency and other PEPD  
438 associated disorders.

439

## 440 **Material and methods**

### 441 **Data set collection**

442 The peptide sequence sets of 475 animals, 122 plants, 72 fungi, 49 archaea, and 236 bacteria were  
443 retrieved from the NCBI. All sequences were pre-processed with a dedicated Python script to generate  
444 customized data files mainly with adjusted sequence names as long sequence names can pose a  
445 problem to some alignment tools (<https://github.com/bpucker/PEPD>). Next, peptide sequence sets  
446 were subjected to BUSCO v3 [54] to assess their completeness based on the reference sequence sets  
447 ‘metazoa odb9’ (animals), ‘embryophyta odb9’ and ‘eukaryota odb9’ (plants), ‘eukaryote odb9’ (fungi),  
448 and ‘bacteria odb9’ (bacteria). Since there is no dedicated reference sequence set available for  
449 archaea, we used the eukaryota and bacteria sets. PEPD bait sequences (Supplementary File 11 and  
450 12) were selected manually based on the literature and/or curated UniProt entries [8,36]. Initial  
451 selection of related sequences was based on a pipeline combining previously published scripts and  
452 using their default parameters [55]. Candidate sequences were identified in a sensitive similarity  
453 search by SWIPE v2.0.12 [56] and filtered through iterative steps of phylogenetic analyses involving  
454 MAFFT v7.299b [57], phyx [58], and FastTree v2.1.10 [59]. Results were manually inspected and  
455 polished to identify *bona fide* orthologous genes with a high confidence. As the average length of PEPD  
456 in animals and plants is around 500 amino acids, sequences outside the range 200-700 amino acids

457 were filtered out to avoid bias in downstream analyses through partial sequences or likely annotation  
458 artefacts.

459

#### 460 **Identification and investigation of conserved residues**

461 MAFFT v.7.299b [57] was applied for the generation of multiple sequence alignments. Resulting  
462 alignments were cleaned by removal of all alignment columns with less than 30% occupancy.  
463 Conserved residues were identified and listed based on positions in the human PEPD sequence  
464 (UniProt ID: P12955) using the Python script 'conservation\_per\_pos.py' (Supplementary File 1). This  
465 analysis was repeated 50 times with randomly reshuffled sequences as the order of sequences can  
466 heavily impact the alignment process [60]. In addition, we compared the alignments generated by  
467 MAFFT v.7.299b to ClustalO v.1.2.4 [61] and MUSCLE v.3.8.31 [62] alignments of the same data sets.  
468 The alignment bias through the order of input sequences was quantified for all positions of the aligned  
469 *Homo sapiens* sequence. For the *in silico* prediction of phosphorylation sites the *H. sapiens* PEPD  
470 sequence (UniProt ID: P12955) was submitted to NetPhos 3.1 [63,64]. Only the best prediction for each  
471 residue with a high confident score of >0.8 was considered for further analyses.

472

#### 473 **Sources of previously reported data**

474 Previously reported residues with functional implications (Supplementary File 7) were checked for  
475 conservation. Additionally, the alignment was screened for highly conserved residues to the best of  
476 our knowledge not previously reported in respect to functionality or structure of PEPD. The results of  
477 the residue conservation analysis for the animal kingdom were mapped to a 3D structure of human  
478 PEPD (PDB: 5G4M). Putative post-translational modification sites were obtained from PhosphoSitePlus  
479 and literature [22,50]. Residues associated with PD were retrieved from literature [22,46].  
480 Non-synonymous single-nucleotide polymorphisms (nsSNPs) [44] and details about observations were  
481 retrieved from the curated BioMuta database [49].

482

#### 483 **Correlation analysis of conservation degree and distance to the active site of PEPD**

484 To determine the conservation degree in correlation to the distance to the active site, the average  
485 localisation of the five metal binding residues was identified and used to calculate the distance of each  
486 residue to this focus of the catalytic site (Supplementary File 13). Information about the position of

487 each residue was taken from the PDB file 5M4G of human PEPD [17]. The Python modules matplotlib  
488 [65] and seaborn (<https://github.com/mwaskom/seaborn>) were applied to construct a conservation  
489 heatmap. In addition, the conservation of all residues in animals was mapped to the 3D model of the  
490 human PEPD by assigning colours within a colour gradient to each amino acid representing its  
491 conservation among animal sequences.

492

### 493 **Phylogenetic analysis**

494 A phylogenetic tree was constructed via FastTree v.2.1.10 [59] based on alignments generated via  
495 MAFFT v.7.299b [57] and trimmed via pxclsq [58] to a minimal occupancy of 60%. The conservation of  
496 different key residues was mapped to this tree for visualization. A Python script  
497 (<https://github.com/bpucker/PEPD>) was deployed to colour all leaves representing sequences with the  
498 conserved residue in red.

499

### 500 **Authors' contributions**

501 HMS and BP designed the experiments, performed bioinformatics analyses, interpreted the results,  
502 and wrote the manuscript.

503

### 504 **Acknowledgements**

505 We thank Samuel F. Brockington, Nathanael Walker-Hale, and Kali Swichtenberg for critical reading of  
506 the manuscript and very helpful comments.

507

### 508 **References**

- 509 [1] Bergmann M, Fruton J. On proteolytic enzymes. XII. Regarding the specificity of aminopeptidases  
510 and carboxypeptidases. A new type of enzyme in the intestinal tract. *J Biol Chem* 1937;177:189–  
511 202.
- 512 [2] Kitchener R I., Grunden A m. Prolidase function in proline metabolism and its medical and  
513 biotechnological applications. *J Appl Microbiol* 2012;113:233–47. doi:10.1111/j.1365-  
514 2672.2012.05310.x.

- 515 [3] Davis NC, Smith EL. Purification and some properties of prolidase of swine kidney. *J Biol Chem*  
516 1957;224:261–75.
- 517 [4] Baksi K, Radhakrishnan AN. Purification and properties of prolidase (imidodipeptidase) from  
518 monkey small intestine. *Indian J Biochem Biophys* 1974;11:7–11.
- 519 [5] Browne P, O’Cuinn G. The purification and characterization of a proline dipeptidase from guinea  
520 pig brain. *J Biol Chem* 1983;258:6147–54.
- 521 [6] Endo F, Hata A, Indo Y, Motohara K, Matsuda I. Immunochemical analysis of prolidase deficiency  
522 and molecular cloning of cDNA for prolidase of human liver. *J Inherit Metab Dis* 1987;10:305–7.  
523 doi:10.1007/BF01800088.
- 524 [7] Myara I, Cosson C, Moatti N, Lemonnier A. Human kidney prolidase—purification, preincubation  
525 properties and immunological reactivity. *Int J Biochem* 1994;26:207–14. doi:10.1016/0020-  
526 711X(94)90147-3.
- 527 [8] Jalving R, Bron P, Kester HCM, Visser J, Schaap PJ. Cloning of a prolidase gene from *Aspergillus*  
528 *nidulans* and characterisation of its product. *Mol Genet Genomics MGG* 2002;267:218–22.  
529 doi:10.1007/s00438-002-0655-8.
- 530 [9] Johnson GL, Brown JL. Partial purification and characterization of two peptidases from  
531 *Neurospora crassa*. *Biochim Biophys Acta* 1974;370:530–40.
- 532 [10] Kubota Y, Shoji S, Motohara K. Purification and properties of prolidase for germinating soybeans.  
533 *Yakugaku Zasshi* 1977;97:111–5.
- 534 [11] Ghosh M, Grunden AM, Dunn DM, Weiss R, Adams MW. Characterization of native and  
535 recombinant forms of an unusual cobalt-dependent proline dipeptidase (prolidase) from the  
536 hyperthermophilic archaeon *Pyrococcus furiosus*. *J Bacteriol* 1998;180:4781–9.
- 537 [12] Booth M, Jennings PV, Níphaolain I, O’cuinn G. Endopeptidase activities of *Streptococcus*  
538 *cremoris*. *Biochem Soc Trans* 1990;18:339–40. doi:10.1042/bst0180339.
- 539 [13] Suga K, Kabashima T, Ito K, Tsuru D, Okamura H, Kataoka J, et al. Prolidase from *Xanthomonas*  
540 *maltophilia*: Purification and Characterization of the Enzyme. *Biosci Biotechnol Biochem*  
541 1995;59:2087–90. doi:10.1271/bbb.59.2087.
- 542 [14] Mikio F, Yuko N, Shigeyuki I, Toshio S. Purification and Characterization of a Prolidase from  
543 *Aureobacterium esteraromaticum*. *Biosci Biotechnol Biochem* 1996;60:1118–22.  
544 doi:10.1271/bbb.60.1118.
- 545 [15] Fernández-Esplá MD, Martín-Hernández MC, Fox PF. Purification and characterization of a  
546 prolidase from *Lactobacillus casei* subsp. *casei* IFPL 731. *Appl Environ Microbiol* 1997;63:314–6.
- 547 [16] Weaver J, Watts T, Li P, Rye HS. Structural Basis of Substrate Selectivity of *E. coli* Prolidase. *PLOS*  
548 *ONE* 2014;9:e111531. doi:10.1371/journal.pone.0111531.

- 549 [17] Wilk P, Uehlein M, Kalms J, Dobbek H, Mueller U, Weiss MS. Substrate specificity and reaction  
550 mechanism of human prolidase. *FEBS J* 2017;284:2870–85. doi:10.1111/febs.14158.
- 551 [18] Lupi A, Rossi A, Campari E, Pecora F, Lund AM, Elcioglu NH, et al. Molecular characterisation of  
552 six patients with prolidase deficiency: identification of the first small duplication in the prolidase  
553 gene and of a mutation generating symptomatic and asymptomatic outcomes within the same  
554 family. *J Med Genet* 2006;43:e58. doi:10.1136/jmg.2006.043315.
- 555 [19] Viglio S, Annovazzi L, Conti B, Genta I, Perugini P, Zanone C, et al. The role of emerging techniques  
556 in the investigation of prolidase deficiency: from diagnosis to the development of a possible  
557 therapeutical approach. *J Chromatogr B Analyt Technol Biomed Life Sci* 2006;832:1–8.  
558 doi:10.1016/j.jchromb.2005.12.049.
- 559 [20] Phang JM, Liu W, Zabirnyk O. Proline metabolism and microenvironmental stress. *Annu Rev Nutr*  
560 2010;30:441–63. doi:10.1146/annurev.nutr.012809.104638.
- 561 [21] Wilk P, Uehlein M, Piwowarczyk R, Dobbek H, Mueller U, Weiss MS. Structural Basis for Prolidase  
562 Deficiency Disease Mechanisms. *FEBS J* 2018. doi:10.1111/febs.14620.
- 563 [22] Lupi A, Tenni R, Rossi A, Cetta G, Forlino A. Human prolidase and prolidase deficiency: an  
564 overview on the characterization of the enzyme involved in proline recycling and on the effects  
565 of its mutations. *Amino Acids* 2008;35:739–52. doi:10.1007/s00726-008-0055-4.
- 566 [23] Gecit İ, Eryılmaz R, Kavak S, Meral İ, Demir H, Piriñçi N, et al. The Prolidase Activity, Oxidative  
567 Stress, and Nitric Oxide Levels of Bladder Tissues with or Without Tumor in Patients with Bladder  
568 Cancer. *J Membr Biol* 2017;250:455–9. doi:10.1007/s00232-017-9971-0.
- 569 [24] Kucukdurmaz F, Efe E, Çelik A, Dagli H, Kılinc M, Resim S. Evaluation of serum prolidase activity  
570 and oxidative stress markers in men with BPH and prostate cancer. *BMC Urol* 2017;17.  
571 doi:10.1186/s12894-017-0303-6.
- 572 [25] Surazynski A, Milyk W, Palka J, Phang JM. Prolidase-dependent regulation of collagen  
573 biosynthesis. *Amino Acids* 2008;35:731–8. doi:10.1007/s00726-008-0051-8.
- 574 [26] Uygun Ilikhan S, Bilici M, Sahin H, Demir Akca AS, Can M, Oz Il, et al. Assessment of the correlation  
575 between serum prolidase and alpha-fetoprotein levels in patients with hepatocellular carcinoma.  
576 *World J Gastroenterol WJG* 2015;21:6999–7007. doi:10.3748/wjg.v21.i22.6999.
- 577 [27] Piriñçi N, Kaba M, Geçit İ, Güneş M, Yüksel MB, Tanık S, et al. Serum prolidase activity, oxidative  
578 stress, and antioxidant enzyme levels in patients with renal cell carcinoma. *Toxicol Ind Health*  
579 2016;32:193–9. doi:10.1177/0748233713498924.
- 580 [28] Demir S, Bulut M, Atli A, Kaplan İ, Kaya MC, Bez Y, et al. Decreased Prolidase Activity in Patients  
581 with Posttraumatic Stress Disorder. *Psychiatry Investig* 2016;13:420–6.  
582 doi:10.4306/pi.2016.13.4.420.

- 583 [29] Verma AK, Bajpai A, Keshari AK, Srivastava M, Srivastava S, Srivastava R. Association of Major  
584 Depression with Serum Prolidase Activity and Oxidative Stress. *Br J Med Med Res* 2017;20:1–8.
- 585 [30] Du X, Tove S, Kast-Hutcheson K, Grunden AM. Characterization of the dinuclear metal center of  
586 *Pyrococcus furiosus* prolidase by analysis of targeted mutants. *FEBS Lett* 2005;579:6140–6.  
587 doi:10.1016/j.febslet.2005.09.086.
- 588 [31] Phang JM, Pandhare J, Liu Y. The Metabolism of Proline as Microenvironmental Stress Substrate.  
589 *J Nutr* 2008;138:2008S-2015S.
- 590 [32] Yang L, Li Y, Bhattacharya A, Zhang Y. PEPD is a pivotal regulator of p53 tumor suppressor. *Nat*  
591 *Commun* 2017;8:2052. doi:10.1038/s41467-017-02097-9.
- 592 [33] Yang L, Li Y, Ding Y, Choi K-S, Kazim AL, Zhang Y. Prolidase directly binds and activates epidermal  
593 growth factor receptor and stimulates downstream signaling. *J Biol Chem* 2013;288:2365–75.  
594 doi:10.1074/jbc.M112.429159.
- 595 [34] Yang L, Li Y, Zhang Y. Identification of prolidase as a high affinity ligand of the ErbB2 receptor and  
596 its regulation of ErbB2 signaling and cell growth. *Cell Death Dis* 2014;5:e1211.  
597 doi:10.1038/cddis.2014.187.
- 598 [35] Are VN, Jamdar SN, Ghosh B, Goyal VD, Kumar A, Neema S, et al. Crystal structure of a novel  
599 prolidase from *Deinococcus radiodurans* identifies new subfamily of bacterial prolidases.  
600 *Proteins Struct Funct Bioinforma* 2017;85:2239–51. doi:10.1002/prot.25389.
- 601 [36] Maher MJ, Ghosh M, Grunden AM, Menon AL, Adams MWW, Freeman HC, et al. Structure of the  
602 Prolidase from *Pyrococcus furiosus*. *Biochemistry* 2004;43:2771–83. doi:10.1021/bi0356451.
- 603 [37] Bazan JF, Weaver LH, Roderick SL, Huber R, Matthews BW. Sequence and structure comparison  
604 suggest that methionine aminopeptidase, prolidase, aminopeptidase P, and creatinase share a  
605 common fold. *Proc Natl Acad Sci U S A* 1994;91:2473–7.
- 606 [38] Lowther WT, Matthews BW. Metalloaminopeptidases: common functional themes in disparate  
607 structural surroundings. *Chem Rev* 2002;102:4581–608.
- 608 [39] Lowther WT, Matthews BW. Structure and function of the methionine aminopeptidases. *Biochim*  
609 *Biophys Acta* 2000;1477:157–67.
- 610 [40] Lupi A, Della Torre S, Campari E, Tenni R, Cetta G, Rossi A, et al. Human recombinant prolidase  
611 from eukaryotic and prokaryotic sources. Expression, purification, characterization and long-  
612 term stability studies. *FEBS J* 2006;273:5466–78. doi:10.1111/j.1742-4658.2006.05538.x.
- 613 [41] Surazyński A, Pałka J, Wołczyński S. Phosphorylation of prolidase increases the enzyme activity.  
614 *Mol Cell Biochem* 2001;220:95–101. doi:10.1023/A:1010849100540.
- 615 [42] Surazynski A, Liu Y, Milyk W, Phang JM. Nitric oxide regulates prolidase activity by  
616 serine/threonine phosphorylation. *J Cell Biochem* 2005;96:1086–94. doi:10.1002/jcb.20631.

- 617 [43] Lynch M, Marinov GK. The bioenergetic costs of a gene. *Proc Natl Acad Sci U S A* 2015;112:15690–  
618 5. doi:10.1073/pnas.1514974112.
- 619 [44] Bhatnager R, Dang AS. Comprehensive in-silico prediction of damage associated SNPs in Human  
620 Prolidase gene. *Sci Rep* 2018;8:9430. doi:10.1038/s41598-018-27789-0.
- 621 [45] Yoshimoto T, Matsubara F, Kawano E, Tsuru D. Prolidase from bovine intestine: purification and  
622 characterization. *J Biochem (Tokyo)* 1983;94:1889–96.
- 623 [46] Falik-Zaccai TC, Khayat M, Luder A, Frenkel P, Magen D, Brik R, et al. A broad spectrum of  
624 developmental delay in a large cohort of prolidase deficiency patients demonstrates marked  
625 interfamilial and intrafamilial phenotypic variability. *Am J Med Genet Part B Neuropsychiatr*  
626 *Genet Off Publ Int Soc Psychiatr Genet* 2010;153B:46–56. doi:10.1002/ajmg.b.30945.
- 627 [47] Ledoux P, Scriver C, Hechtman P. Four novel PEPD alleles causing prolidase deficiency. *Am J Hum*  
628 *Genet* 1994;54:1014–21.
- 629 [48] Cechowska-Pasko M, Pałka J, Wojtukiewicz MZ. Enhanced prolidase activity and decreased  
630 collagen content in breast cancer tissue. *Int J Exp Pathol* 2006;87:289–96. doi:10.1111/j.1365-  
631 2613.2006.00486.x.
- 632 [49] Wu T-J, Shamsaddini A, Pan Y, Smith K, Crichton DJ, Simonyan V, et al. A framework for organizing  
633 cancer-related variations from existing databases, publications and NGS data using a High-  
634 performance Integrated Virtual Environment (HIVE). *Database J Biol Databases Curation*  
635 2014;2014:bau022. doi:10.1093/database/bau022.
- 636 [50] Hornbeck PV, Zhang B, Murray B, Kornhauser JM, Latham V, Skrzypek E. PhosphoSitePlus, 2014:  
637 mutations, PTMs and recalibrations. *Nucleic Acids Res* 2015;43:D512-520.  
638 doi:10.1093/nar/gku1267.
- 639 [51] Deribe YL, Pawson T, Dikic I. Post-translational modifications in signal integration. *Nat Struct Mol*  
640 *Biol* 2010;17:666–72. doi:10.1038/nsmb.1842.
- 641 [52] Nussinov R, Tsai C-J, Xin F, Radivojac P. Allosteric post-translational modification codes. *Trends*  
642 *Biochem Sci* 2012;37:447–55. doi:10.1016/j.tibs.2012.07.001.
- 643 [53] Kyte J. *Structure in Protein Chemistry*. Garland Science; 2018.
- 644 [54] Simão FA, Waterhouse RM, Ioannidis P, Kriventseva EV, Zdobnov EM. BUSCO: assessing genome  
645 assembly and annotation completeness with single-copy orthologs. *Bioinforma Oxf Engl*  
646 2015;31:3210–2. doi:10.1093/bioinformatics/btv351.
- 647 [55] Yang Y, Moore MJ, Brockington SF, Soltis DE, Wong GK-S, Carpenter EJ, et al. Dissecting Molecular  
648 Evolution in the Highly Diverse Plant Clade Caryophyllales Using Transcriptome Sequencing. *Mol*  
649 *Biol Evol* 2015;32:2001–14. doi:10.1093/molbev/msv081.

- 650 [56] Rognes T. Faster Smith-Waterman database searches with inter-sequence SIMD parallelisation.  
651 BMC Bioinformatics 2011;12:221. doi:10.1186/1471-2105-12-221.
- 652 [57] Katoh K, Standley DM. MAFFT Multiple Sequence Alignment Software Version 7: Improvements  
653 in Performance and Usability. Mol Biol Evol 2013;30:772–80. doi:10.1093/molbev/mst010.
- 654 [58] Brown JW, Walker JF, Smith SA. Phyx: phylogenetic tools for unix. Bioinformatics 2017;33:1886–  
655 8. doi:10.1093/bioinformatics/btx063.
- 656 [59] Price MN, Dehal PS, Arkin AP. FastTree: Computing Large Minimum Evolution Trees with Profiles  
657 instead of a Distance Matrix. Mol Biol Evol 2009;26:1641–50. doi:10.1093/molbev/msp077.
- 658 [60] Chatzou M, Floden EW, Di Tommaso P, Gascuel O, Notredame C, Halanych K. Generalized  
659 Bootstrap Supports for Phylogenetic Analyses of Protein Sequences Incorporating Alignment  
660 Uncertainty. Syst Biol 2018. doi:10.1093/sysbio/syx096.
- 661 [61] Sievers F, Wilm A, Dineen D, Gibson TJ, Karplus K, Li W, et al. Fast, scalable generation of high-  
662 quality protein multiple sequence alignments using Clustal Omega. Mol Syst Biol 2014;7:539–  
663 539. doi:10.1038/msb.2011.75.
- 664 [62] Edgar RC. MUSCLE: multiple sequence alignment with high accuracy and high throughput. Nucleic  
665 Acids Res 2004;32:1792–7. doi:10.1093/nar/gkh340.
- 666 [63] Blom N, Gammeltoft S, Brunak S. Sequence and structure-based prediction of eukaryotic protein  
667 phosphorylation sites. J Mol Biol 1999;294:1351–62. doi:10.1006/jmbi.1999.3310.
- 668 [64] Blom N, Sicheritz-Pontén T, Gupta R, Gammeltoft S, Brunak S. Prediction of post-translational  
669 glycosylation and phosphorylation of proteins from the amino acid sequence. Proteomics  
670 2004;4:1633–49. doi:10.1002/pmic.200300771.
- 671 [65] Hunter JD. Matplotlib: A 2D Graphics Environment. Comput Sci Eng 2007;9:90–5.  
672 doi:10.1109/MCSE.2007.55.

673

## 674 **Supplementary material**

675 **Supplementary File 1: PEPD peptide sequences used for multiple sequence alignments.**

676

677 **Supplementary File 2: Length distribution of PEPD orthologues.** PEPD sequence length is displayed on  
678 the x-axis, while the frequency of a sequence length in percentage is shown on the y-axis. Archaea  
679 orthologues are coloured in violet, bacteria in black, fungi in blue, plants in green, and animals in red.

680

681 **Supplementary File 3: Alignment bias control.** The y-axis displays the conservation degree ratio of  
682 each residue across species as well as the variation of this value between alignments (Supplementary  
683 File 4). The x-axis shows the corresponding residue position in the human PEPD amino acid sequence



684 (UniProt ID: P12955). The green line shows the median of all conservation values observed across all  
685 generated alignments. The red line displays the maximum conservation degree and the blue line the  
686 minimum conservation degree observed for the respective position across all alignments, respectively.

687

688 **Supplementary File 4: Alignment bias control values.** The variation of the calculated conservation  
689 degree based on multiple alignments by MAFFT, ClustalO, and MUSCLE is listed. The first column  
690 contains the position in the reference sequence human PEPD (UniProt ID: P12955). In addition, the  
691 minimal conservation degree observed over 50 alignments, the median of all these conservation  
692 values, and the maximal observed value are provided.

693

694 **Supplementary File 5: Conservation degree of PEPD residues across species.** The conservation degree  
695 of each residue, ranging from 0-1.0 (1.0 being perfect conservation) is listed for animals, plants, fungi,  
696 bacteria, and archaea. The alignment position of each residue is given in the first column, while the  
697 second column refers to the corresponding position in human PEPD (Reference sequence position,  
698 UniProt ID: P12955). The amino acid frequency (AAF) of the most abundant (AAF1) and second  
699 abundant amino acid (AAF2) at a certain position is given for each species. A gap is indicated by “-”.

700

701 **Supplementary File 6: Distance of each residue to the active site of human PEPD.** The distance of  
702 each residue to the active site of human PEPD (PDB ID: 5M4G) is stated in arbitrary units.

703

704 **Supplementary File 7: Previously reported residues for conservation analysis.** All previously reported  
705 residues with relevance to structure and/or function of PEPD are listed with their associated function  
706 and reference. The residue position is derived from human PEPD (UniProt ID: P12955). PTMs identified  
707 in *H. sapiens* or *M. musculus* are marked through Hs and Mm in brackets, respectively.

708

709 **Supplementary File 8: Conserved residues in human PEPD 3D model with structural and/or**  
710 **functional relevance.** The ribbon of the human 3D PEPD model is shown in blue, while residues of  
711 interest are marked in red or alternatively in beige. The metal ions are displayed in violet and water  
712 molecules are shown in cyan.

713 (A) R450 (highlighted in red) is located near the metal binding centre.

714 (B) T458 and G461 are marked in red and are located in a peripheral loop.

715 (C) G369 and H366 are located near the metal binding residue H370, where H366 might narrow down  
716 the active site. Moreover, P365, G367, and L368 might be involved in substrate specificity of animal,  
717 plant, fungi, and bacteria PEPD.

718 (D) T299, F298, G296, and P293 stabilize the pita-bread fold by strengthening the loop near the  
719 catalytic site.

720 (E) E219 stabilizes PEPD possibly through the interaction with the side chain of another conserved  
721 residue, like N250 or S247.

722 (F) Possible interaction of R401 and E182 through a hydrogen bond, thus stabilizing the structure of  
723 PEPD.

724

725 **Supplementary File 9: BUSCO assessment of peptide data set quality.** For each analysed organism  
726 presence (+) or absence (-) of PEPD in their peptide dataset is indicated. Completeness of the data sets  
727 was assessed based on the detection of BUSCO sequences.

728

729 **Supplementary File 10: Discussion of possible limitations.**

730

731 **Supplementary File 11: Identifier of bait sequences.** Donor species and NCBI or UniProt ID of PEPD  
732 bait sequences is listed.

733

734 **Supplementary File 12: Bait sequences.**

735

736 **Supplementary File 13: Approach for residue distance calculation.** Schematic illustration of the  
737 approach used to calculate the distances of all amino acids in PEPD to the active site. Different colours  
738 indicate different amino acids with different degrees of conservation across species.

739
